# Supplementary material for: A Critical Evaluation of microRNA Biomarkers in Non-Neoplastic Disease
Source: PLoS One. 2014 Feb 26;9(2):e89565. doi: 10.1371/journal.pone.0089565 (PMC3935874; doi:10.1371/journal.pone.0089565)
Supplement: Table S2 — Log2 normalized microRNA data for 457 microRNAs in 18 cell types. (XLS) [file pone.0089565.s006.xls]

## Sheet: miRNA log2 expression
microRNA	myocyte	lymphatic_EC	SMC	endothelial	fibroblast	adipocyte	epithelial_cell	hepatocyte	ductal_cell	acinar_cell	neutrophil	red_blood_cell	monocyte	nk_cell	centroblast	plasma_cell	naïve_b_cell	memory_b_cell
let-7a-5p	11.1948	10.2174	11.9328	11.0471	10.748	11.713	11.5452	11.7076	12.5808	12.1816	9.31389	11.3857	10.8676	9.4786	11.0893	11.3352	11.0928	11.102
let-7b-5p	10.0154	10.3204	10.9232	10.1487	10.6371	10.3222	10.826	10.7265	11.4553	11.2676	9.77272	10.3159	9.3872	6.39572	8.66975	9.28766	9.72376	9.82718
let-7c	10.318	9.66994	10.1296	9.39152	9.24918	10.0873	9.41085	10.0838	10.8619	10.5863	6.68918	8.89252	8.02212	6.3765	7.37271	7.4978	8.14918	7.99582
let-7d-5p	10.2809	7.40135	9.87934	9.59311	8.39553	9.35184	9.11609	9.24744	9.62747	9.5206	8.49692	10.0253	9.65736	9.0369	9.7605	9.97012	9.94403	9.77595
let-7e-5p	9.57663	8.25029	10.1464	10.0466	8.5184	9.87166	9.3139	7.49351	9.35321	8.52376	6.07909	6.63065	7.86221	6.22788	7.55116	7.14709	6.73753	6.70821
let-7f-5p	10.9979	9.869	11.0345	10.5278	9.98693	11.0892	11.1735	11.4751	11.9577	11.9015	8.44299	10.9206	10.9787	9.403	11.1943	10.7241	11.0433	10.995
let-7g-5p	10.3309	8.4644	9.92786	9.40805	8.15609	9.52408	10.0799	10.9619	10.4937	10.4864	8.89761	10.5398	10.816	8.48757	10.6173	10.7185	11.0794	10.9681
let-7i-5p	9.34475	10.0075	10.1602	9.92268	9.77221	10.057	8.2518	9.12404	9.64337	8.62481	8.86173	9.90815	9.42017	8.32993	9.20072	9.56606	9.97754	9.56886
miR-1	11.3152	5.82668	5.82095	5.86015	5.71053	5.87973	5.94693	5.8586	6.19939	5.9257	5.82125	5.81124	6.42459	6.29769	5.89297	5.88022	5.91765	5.93912
miR-100-5p	10.0193	8.44136	11.2027	9.82229	9.4085	10.3124	7.2986	8.5483	8.77389	7.46945	5.89014	6.50477	6.15376	5.88114	6.68098	6.08463	6.06882	5.99606
miR-101-3p	7.64265	6.56523	6.00118	6.31093	6.22235	8.24397	7.37794	8.75492	7.79819	8.0298	6.55571	9.58487	8.53487	6.20416	7.4891	7.83766	9.09568	8.16585
miR-103a-3p	8.87782	9.32201	9.58886	10.0583	9.36373	8.97682	9.47349	9.08126	8.47813	8.14676	9.33457	9.92956	10.1102	10.3708	9.57102	9.67658	9.61017	9.38017
miR-105-5p	5.76855	5.79759	5.78801	5.76279	5.78221	5.79686	5.77904	5.78504	5.77539	5.79003	5.93761	5.82779	5.7902	5.75973	5.78215	5.76985	5.78165	5.8041
miR-106b-5p	7.10455	8.22712	7.65332	8.70714	9.35479	8.06905	8.246	7.91344	7.2801	7.35689	9.74633	10.6375	9.01675	8.24143	9.88438	9.95199	9.38365	8.79414
miR-107	8.67913	8.95796	9.52491	9.49485	8.63949	9.21754	9.27792	9.52499	8.57762	8.35534	8.95466	10.2698	9.88466	10.6894	9.40341	9.86888	9.5006	9.2649
miR-10a-5p	8.4014	7.73496	6.19206	7.31595	5.78865	7.64919	6.06898	6.21897	8.59852	7.40114	5.94198	6.0468	6.45841	7.24022	6.07108	6.03453	6.27628	6.43428
miR-10b-5p	7.45512	9.13151	6.05068	6.43841	5.91368	7.88117	5.98714	5.932	7.4028	6.92929	5.99253	5.9127	6.0549	6.40606	5.98985	5.9527	6.0126	6.07812
miR-122-5p	5.84743	5.93039	5.85295	5.74734	5.85988	5.79537	5.9225	11.6749	5.86383	5.81833	7.76575	5.85834	5.78731	6.05817	5.90944	5.9681	5.87931	5.93195
miR-124-3p	5.72599	5.7912	5.81737	5.91624	5.95147	5.87596	5.71447	5.71405	5.7296	5.72055	5.91555	5.76068	5.80135	9.46882	5.72554	5.73242	5.72169	5.74505
miR-125a-5p	9.34452	7.37397	8.11044	9.51065	6.66395	8.21416	8.59533	6.71473	7.90938	7.62617	7.23196	6.7924	7.6863	7.33913	7.08205	6.86389	6.68571	6.73375
miR-125b-5p	11.0487	9.24096	10.5418	10.1568	11.3726	10.8394	8.37351	9.79939	10.9123	9.6236	6.24371	6.44947	6.54894	6.73952	7.7186	7.01377	6.12653	6.21035
miR-126-3p	6.39094	11.4079	7.15123	12.2419	5.2362	6.4318	6.59581	8.8704	9.34861	9.19334	6.53088	9.41067	10.526	6.77976	6.27349	6.34086	6.23716	6.23831
miR-126-5p	5.93665	9.73757	6.15291	8.3769	5.70448	5.98352	5.98288	6.35413	6.24377	6.21753	6.06369	6.71147	7.46814	6.2523	5.91473	5.926	5.88459	5.96458
miR-127-3p	6.58234	6.88783	8.35473	7.43425	8.15427	7.34143	5.91106	5.72121	6.44741	6.53002	6.6751	5.72861	6.11002	6.16725	5.70389	5.70686	5.7399	5.69522
miR-128	8.78001	6.3646	7.01208	6.6563	6.07186	6.16224	6.72109	6.62305	6.22426	6.26802	5.67813	6.87753	6.81675	6.58324	7.46624	6.91186	7.10901	6.9326
miR-129-5p	5.81125	5.85946	5.7372	5.77375	6.13544	5.83253	5.74213	5.75373	5.83798	5.85455	7.24653	5.86324	5.75828	5.75722	6.06319	5.85851	5.8612	5.93048
miR-130a-3p	9.00536	8.16721	9.66189	9.22337	10.4481	9.72952	7.93129	7.58326	8.87848	8.50814	5.78348	8.30565	9.25963	5.91708	6.02764	6.27443	6.06752	5.88347
miR-130b-3p	6.50318	7.49454	8.69733	9.03645	7.85072	6.9934	6.35966	6.88132	6.71063	8.67026	6.11316	6.98242	7.40466	8.81153	7.96653	7.21921	6.70347	6.90865
miR-132-3p	6.0157	6.17619	6.0709	6.39581	6.24226	6.53691	6.28413	6.23738	6.4908	6.41617	5.79027	6.19363	6.07955	7.45386	6.1516	6.36348	6.07352	6.22813
miR-133a	10.4544	5.60722	6.74838	6.10766	5.50206	6.26302	6.07313	6.24464	6.19045	6.187	5.90972	6.43693	6.26129	5.89587	6.16811	6.30709	6.26202	6.24243
miR-133b	11.8301	5.68447	6.27769	6.34792	5.68384	6.06325	5.8629	5.89142	6.15429	6.03641	6.40255	6.10462	6.4759	6.61672	5.96655	6.09125	6.08096	5.98392
miR-134	6.30811	6.88726	5.51706	6.24106	7.52171	5.7372	6.21864	6.46391	5.75709	5.63481	5.68731	6.2789	5.55567	7.65451	6.0411	6.80502	6.23215	6.39431
miR-135a-5p	5.82008	5.84055	6.04089	5.85566	5.79838	5.89926	6.01256	6.12435	5.90332	5.94195	5.90999	5.82163	5.91829	6.01276	5.98681	5.93641	5.92841	5.99892
miR-135b-5p	5.86451	5.99403	5.9327	5.90284	5.94268	5.94386	8.81468	5.94876	6.59392	6.15771	6.3727	5.86886	5.84586	5.85062	5.92883	5.92402	5.85312	5.88311
miR-136-5p	6.52766	5.9704	6.21734	6.26403	7.57016	9.13313	6.10128	6.05117	6.21975	6.39791	6.77196	6.0103	6.29753	6.03174	5.96605	5.95365	5.96769	5.96286
miR-137	7.21331	5.96086	7.02966	6.77545	7.68493	6.61934	5.96843	5.7639	5.87471	5.88663	5.59167	5.81955	5.82822	6.16423	5.88164	5.84173	5.84067	5.79263
miR-138-5p	6.13388	5.81266	5.839	5.83049	5.88517	6.21561	5.90538	5.94417	5.88099	5.88943	5.8257	5.82343	5.81405	5.85165	7.1711	6.08333	5.85151	6.09016
miR-139-5p	5.97917	6.97001	5.86092	6.52127	5.6739	5.82431	5.80653	5.83348	6.26611	6.07427	6.25523	5.81581	6.39482	6.20636	5.78853	5.80388	5.8078	5.79879
miR-140-5p	7.06526	6.60234	7.83381	6.78908	7.03833	8.67247	6.53821	7.13634	6.7745	6.57464	7.5582	8.5755	7.93596	6.45994	7.85269	7.34705	8.16412	7.49472
miR-141-3p	5.54849	6.16864	5.52525	5.73929	6.17399	5.62395	11.0108	6.10382	9.16946	10.3785	5.82408	5.57165	5.90929	6.36007	6.11735	6.03634	6.22779	5.84964
miR-142-3p	6.11748	6.05767	5.86513	5.8575	5.85539	6.12666	5.93763	6.03536	7.7287	6.88636	11.2839	10.339	11.4706	10.6091	11.302	11.1439	11.4981	11.014
miR-142-5p	5.90291	5.92324	5.81244	5.38367	5.93492	5.80005	5.80586	5.76334	6.33624	6.00599	8.65396	8.98628	8.81514	7.96867	9.97982	9.31566	9.97483	9.47633
miR-143-3p	9.24599	3.84551	7.38409	6.96593	7.46413	9.56078	7.09134	7.07302	7.9367	7.58914	7.00928	7.11646	7.3053	7.04458	7.08642	7.12063	7.07583	7.0748
miR-144-3p	5.31737	6.83086	5.31162	4.80599	6.7181	5.36297	5.40244	5.36056	6.5275	5.93328	4.85433	10.9682	6.19352	5.0552	5.32617	5.35842	5.36348	5.44014
miR-145-5p	8.24845	4.42651	7.47067	7.64208	8.75864	9.73612	6.57209	6.95778	10.3816	8.35642	6.96346	6.67819	7.37295	7.50207	6.62793	6.72477	6.61777	6.58762
miR-146a-5p	5.89638	8.02374	8.77519	7.81779	5.9149	5.96676	6.5119	6.28894	6.73584	6.34262	5.75844	6.13695	8.96488	9.20763	8.99954	7.8168	8.10052	9.28465
miR-146b-5p	6.20877	5.69828	6.16563	5.67596	5.80272	6.89306	6.27524	8.78135	7.23112	7.18991	5.738	6.51473	8.72919	9.01746	6.52834	7.03046	7.54146	7.50682
miR-147a	5.79716	5.81162	5.77906	5.79613	5.796	5.78481	5.75615	5.76088	5.79922	5.79158	5.84092	5.77942	5.78967	6.02132	5.76287	5.81704	5.76594	5.84876
miR-148a-3p	5.96076	6.08345	5.85948	6.08496	5.98782	7.97197	8.31806	9.8107	10.0786	12.1347	7.0244	7.69211	7.45132	5.88714	8.59136	8.09094	6.62201	7.37277
miR-148b-3p	6.02444	6.50155	6.28349	6.80037	6.3404	6.40787	6.93601	6.75725	6.3948	6.77141	6.20692	7.00646	7.40822	7.02279	6.72412	6.69493	6.99636	6.71713
miR-149-5p	6.24166	5.82584	7.45313	6.67029	6.23939	6.15473	7.11734	6.18646	6.11122	6.146	7.71129	6.4635	6.15257	6.28979	5.96201	6.11958	6.072	6.15572
miR-150-5p	5.60782	6.02637	5.79094	5.88337	6.02699	5.7062	5.90239	5.76052	6.82657	6.22102	5.70062	5.63014	10.9457	11.1196	8.71701	11.3471	11.9883	11.5912
miR-151a-3p	6.35191	7.77475	7.40507	8.25232	6.83723	6.55288	6.91304	6.97472	6.46743	6.4873	5.98964	6.73155	7.60687	5.98603	6.93959	6.83854	7.19891	6.9574
miR-152	7.26441	6.11444	6.30644	6.30342	7.0665	7.0973	6.8265	6.95741	6.49435	6.58721	5.95874	5.96608	6.37095	6.00829	6.16892	6.26106	6.16908	6.13334
miR-153	5.75346	5.88687	5.78672	5.46747	5.89805	5.8298	5.81491	5.75675	5.89144	6.00333	5.46277	5.76528	5.74279	5.63166	5.77921	5.79425	5.79432	5.80363
miR-154-3p	6.18242	5.93276	6.58317	6.458	6.559	6.31361	5.81284	5.90483	6.00936	6.20343	5.86906	5.91103	5.99042	5.9954	5.82039	5.79131	5.79022	5.78931
miR-154-5p	6.06726	6.1186	6.31971	6.2678	6.05239	6.24902	5.92122	5.92204	6.06008	6.25858	6.1147	5.90942	6.06197	6.10264	5.79774	5.82817	5.83819	5.80208
miR-155-5p	6.23749	6.76854	8.44729	8.03395	8.93366	6.53161	6.14899	6.699	6.36054	6.10782	5.96434	6.33364	7.4973	9.74659	9.78403	10.3132	9.83593	10.4554
miR-15a-5p	6.92826	7.86461	9.18089	8.6047	9.07767	9.28658	8.66973	8.5573	7.79309	8.46494	11.0107	10.2423	9.50194	7.9475	9.91489	8.83241	9.79149	9.34395
miR-15b-5p	7.22066	8.32513	10.2325	10.3369	9.96986	9.40409	9.29977	8.7786	8.38434	8.58388	10.9644	11.5037	10.697	11.0365	11.3693	11.2811	9.99764	10.4712
miR-16-5p	9.20215	9.90118	10.2247	9.97785	10.3727	10.0617	10.1204	9.8725	10.4123	10.2782	11.6334	11.7152	11.0625	10.7507	11.7451	11.094	11.6021	11.2657
miR-17-3p	6.27781	6.44163	6.23547	6.87202	6.02905	6.85639	6.63288	6.85662	6.22385	6.18363	6.10541	7.84589	6.93021	7.07449	7.57513	6.88833	7.09133	6.73619
miR-17-5p	7.64177	8.39433	8.51821	9.77394	7.39775	7.72366	8.23221	8.44627	7.75598	7.43935	6.52632	10.0832	9.2259	9.99959	10.6059	9.17993	9.35858	9.23288
miR-181a-3p	6.12807	5.867	6.54006	6.64125	6.02749	6.07739	6.04269	5.75445	5.99959	5.92235	6.05274	5.89347	6.37141	7.3759	6.5129	6.25666	6.30137	5.95287
miR-181a-5p	7.09612	8.4193	8.3374	7.71386	7.23933	6.71975	6.93417	6.49888	7.5871	7.11673	6.60369	7.37627	8.43343	10.3637	8.43327	8.32573	8.61228	7.79465
miR-181b-5p	6.42708	8.67587	7.53982	8.0428	7.40046	6.14148	6.80009	6.41346	6.83265	6.47098	8.4823	6.02031	6.93467	9.37087	7.96161	7.62537	7.88075	7.26349
miR-181c-5p	6.39089	6.20732	5.72489	6.34272	5.95512	6.08656	6.11285	5.85859	6.10939	6.2503	6.26965	6.08549	6.55083	7.4267	6.17951	6.30576	6.30374	6.33022
miR-181d	5.95229	7.812	5.61099	6.62077	7.02558	5.94807	6.01394	5.89727	5.98583	6.03838	9.20304	5.86747	6.56104	7.23492	7.20843	6.00222	7.54788	7.74819
miR-182-3p	5.78527	5.80043	5.89073	5.79419	5.82691	5.82711	5.87994	5.781	5.80424	5.82448	5.82121	5.85232	5.82206	5.89238	5.78326	5.79393	5.76817	5.78676
miR-182-5p	5.88777	5.6544	5.87199	5.86679	5.68196	5.86641	6.71804	5.91347	6.06844	6.30247	6.36526	6.64815	5.9521	5.94753	5.91526	5.84878	5.88427	5.8624
miR-183-5p	5.73452	5.90186	5.88664	5.70118	5.91437	5.74845	7.18526	6.00156	5.96367	6.3127	5.70888	7.49813	5.80329	5.98191	6.03975	6.09124	5.80392	5.8036
miR-184	5.90531	5.873	5.79637	5.82991	5.97272	5.7591	5.92871	5.93885	5.8474	5.81533	5.95269	5.85882	5.75819	5.85975	5.8844	5.87602	5.86867	5.91393
miR-185-5p	6.54991	7.08525	6.70104	7.58844	6.43758	6.62104	7.06762	7.49641	6.50098	6.55729	6.60512	10.0441	8.47972	7.55172	7.61025	7.59058	7.55647	7.16204
miR-186-5p	6.3737	7.53458	6.06497	6.70543	6.64099	6.36687	6.86292	7.22724	6.47245	6.60741	5.9918	7.17816	7.44436	7.95943	7.02082	6.91324	7.82423	7.2161
miR-187-3p	5.81311	5.77148	5.90599	5.75052	5.76313	5.80445	5.81461	5.93903	5.80117	5.80117	5.75428	5.92238	5.79781	5.87063	5.81283	5.95794	5.8233	5.81101
miR-188-5p	6.40602	8.20855	5.54022	5.96021	6.81719	5.78984	6.00882	6.95684	5.79335	5.88088	8.87221	5.99923	5.60318	8.13552	6.49772	7.29943	6.36456	6.57362
miR-18a-3p	5.83927	5.83649	5.90964	5.81004	5.9216	5.83355	5.85309	5.90907	5.85519	5.82825	6.01899	5.88956	5.83059	5.80174	5.98473	5.83884	5.89517	5.84186
miR-18a-5p	6.42652	6.67036	6.12409	7.94352	6.70829	6.47907	6.67841	6.93436	6.33429	6.22986	6.26512	8.97833	7.36358	7.81286	8.61037	7.38689	7.30423	6.99925
miR-18b-5p	5.95981	5.98265	5.80862	6.34805	5.89983	6.01459	6.10089	5.95875	5.89653	5.8364	6.02978	7.95129	6.31729	7.14421	7.15715	6.49536	6.43224	6.22493
miR-190a	5.94953	5.9104	5.87718	5.84446	5.82223	5.96902	5.95304	5.94995	5.84913	5.86879	5.87127	5.88686	5.833	6.24586	5.90977	6.03977	5.97801	5.95126
miR-191-3p	5.92445	7.01654	7.92519	6.36961	6.16318	6.08683	6.1536	6.53074	5.98984	6.12386	5.5232	6.76886	6.26494	6.68842	6.45767	6.92404	6.60018	6.73394
miR-191-5p	6.31869	6.12568	6.09395	6.06674	5.86543	6.04138	6.32548	6.07128	6.05699	5.96032	6.05718	6.42423	6.25457	6.08849	6.17071	6.15319	6.05756	6.11014
miR-192-5p	5.96462	5.83525	6.14237	5.87622	5.92573	6.03639	6.34975	10.9363	9.78114	9.01871	6.3399	8.47611	6.84208	6.25367	6.54724	6.47263	6.9013	6.58022
miR-193a-3p	8.65239	6.17476	8.35355	7.74785	8.55697	9.65651	6.83169	7.39137	6.10445	6.1926	6.17438	6.30439	6.06632	5.85209	6.09167	5.91434	6.1645	5.83442
miR-193b-3p	7.65954	6.30318	7.59948	7.40274	7.7224	7.76134	7.46429	9.07549	6.58012	7.51003	6.08153	6.14959	6.36461	6.24069	7.94774	7.46087	6.64054	7.85557
miR-194-5p	5.97778	5.81777	5.82171	5.9206	5.80144	5.92736	6.28534	10.0944	9.23673	8.2329	5.92126	7.98925	6.37317	5.97792	6.24018	6.31467	6.7711	6.36859
miR-195-5p	6.84282	6.33479	6.75734	7.40918	5.67815	8.49404	6.4266	8.39938	8.99148	9.67827	6.09701	7.2144	7.10166	6.28408	7.64397	8.1386	7.97045	7.25909
miR-196a-5p	6.89587	6.2749	5.89645	5.75194	5.87542	8.19004	5.93016	5.86707	5.82173	5.82344	6.35878	5.87948	5.81799	5.7288	5.88209	5.90068	5.95957	5.93122
miR-196b-5p	6.34415	6.0304	5.91467	6.02364	7.33839	6.93013	5.87653	6.10135	5.81732	5.83435	6.90823	6.34497	6.05899	5.79135	5.87579	6.07033	5.84723	5.85457
miR-197-3p	5.98358	6.6629	6.97902	6.6306	8.67395	6.03917	6.42596	6.72218	6.38204	6.55857	10.9742	6.46604	7.16763	7.7089	7.1153	6.90326	7.51093	7.73769
miR-198	6.14038	6.49755	5.90363	5.85499	6.23515	5.9032	6.10568	6.07343	6.0501	5.91469	5.93745	5.92183	5.90182	6.0822	6.22193	6.52483	6.17976	6.26151
miR-199a-5p	8.99853	6.02677	9.23417	6.62248	9.57353	9.90394	5.94776	6.10704	9.06314	8.00129	6.33074	5.97137	8.45742	6.22547	6.91482	6.24843	6.02671	5.99691
miR-199b-5p	6.86527	5.76095	6.4977	6.13182	8.27426	8.50424	5.88684	5.83541	8.32129	7.45658	6.42345	5.97565	6.33234	6.11408	5.94481	5.96096	5.98399	5.96713
miR-19a-3p	8.40687	7.2425	6.52854	8.2757	8.55142	8.50865	8.11514	8.24832	7.51891	7.9125	6.96134	10.2496	8.88894	7.35035	10.5642	9.67133	9.1762	8.85652
miR-19b-3p	9.05023	9.44321	9.00004	10.0411	9.42043	9.62149	9.48905	9.35538	9.35652	9.59382	9.04716	10.9814	9.95898	9.78444	11.1333	10.7497	10.18	10.2399
miR-200a-3p	5.85445	5.7175	5.82767	5.817	5.75095	5.84655	9.65605	6.88126	8.8272	9.14649	5.81723	5.81576	5.87009	5.87044	5.92693	6.24973	6.12779	5.98207
miR-200a-5p	5.84449	5.87333	5.75171	5.70729	5.93082	5.73735	6.46123	5.8207	5.94054	5.90622	6.3345	5.78277	5.76094	5.70949	5.80037	5.94532	5.75908	5.79468
miR-200b-3p	6.00824	5.54931	6.02832	6.04421	5.5336	5.98886	10.7112	7.8254	10.2836	9.75956	6.90814	6.06823	6.17833	6.03772	6.14859	6.52406	6.45753	6.46195
miR-200c-3p	6.30818	5.1577	6.248	6.02575	5.13003	6.24819	10.6867	7.32821	9.83515	10.3926	6.14112	6.25621	6.69587	6.24127	6.91717	7.28849	7.10896	7.00993
miR-202-3p	6.58227	7.96448	5.90212	5.83964	8.20341	6.04978	6.44147	6.37857	6.1185	6.0772	5.77684	6.61601	6.01471	6.50591	7.16192	6.51851	7.0784	7.2421
miR-202-5p	5.84038	5.81326	5.93193	5.91061	5.82573	5.89717	5.82163	5.8097	5.85204	5.91755	5.97041	5.90032	5.89635	5.80811	5.85797	5.88343	5.87658	5.80959
miR-203	6.0336	5.63658	5.94313	5.85158	5.62197	5.98654	10.5349	6.64266	6.46263	6.26963	5.69746	6.10357	5.98614	5.96597	6.208	6.59562	6.06128	6.41039
miR-204-5p	5.83275	6.77827	6.71967	6.57307	5.9716	6.24492	5.84551	6.13915	6.15913	6.21063	6.4027	5.98508	6.00848	6.22902	5.83846	5.81424	5.89841	5.84437
miR-205-5p	5.9477	5.73696	5.88884	5.71528	5.79272	5.89016	11.7031	5.86627	5.88692	5.87079	5.75437	5.96564	5.90121	5.81028	6.24902	6.34575	5.98646	6.42737
miR-206	11.5127	5.8974	5.79251	5.76511	5.8854	5.82194	5.94382	5.94829	5.84933	5.82522	9.67196	5.79904	5.79948	6.27652	6.02946	5.98545	6.10267	6.15356
miR-208a	5.8116	5.75275	5.76976	5.77125	5.75943	5.75754	5.77894	5.76372	5.77894	5.75815	5.98225	5.854	5.75313	5.81537	5.76589	5.7642	5.7625	5.79
miR-20a-5p	8.21338	8.82476	9.41794	9.93415	8.38859	8.72907	9.19085	9.13628	9.48961	8.71067	8.90364	11.3055	9.67308	9.57587	11.0717	10.1003	10.0961	9.9138
miR-20b-5p	7.50492	7.57522	6.44925	7.8176	6.69546	7.08031	7.38758	7.51822	7.41174	7.2965	6.15631	9.77071	8.29987	9.07247	9.35909	8.3082	8.92773	8.50723
miR-210	6.48669	6.70771	7.5609	6.25866	6.98946	8.05222	8.02336	6.65058	6.39811	5.96457	6.01865	7.5011	6.05031	10.2618	7.51835	7.52222	7.35912	7.03181
miR-211-5p	5.80503	5.82927	6.21295	5.94882	5.86033	5.912	5.77284	5.63983	5.83429	5.92002	7.13655	5.9359	5.88336	5.9104	5.76897	5.78739	5.83203	5.82203
miR-212-3p	7.04384	6.02611	6.03893	6.13167	7.40535	6.11915	7.07381	6.2968	6.00794	6.08458	6.29853	7.3892	6.22713	5.93024	7.03469	6.92669	7.0927	7.3397
miR-214-3p	7.38772	6.18703	9.38353	6.17201	9.07509	9.18321	6.04413	6.16937	8.48601	7.27241	6.91856	6.06046	6.03668	5.85873	6.61593	6.20444	6.06632	6.10169
miR-215	5.95713	5.78709	5.96679	5.88386	5.87307	5.98655	6.17419	10.1908	9.22568	8.49018	5.99573	7.44593	6.36203	6.08609	6.2562	6.22884	6.49067	6.30182
miR-21-5p	11.9739	11.8785	12.0136	11.7259	12.3411	11.9934	11.9924	11.3614	11.6167	11.0613	10.6104	9.15586	11.5548	10.0769	11.321	11.156	10.5196	10.9821
miR-216a	5.75691	5.86335	5.77258	6.02085	5.80639	5.81273	5.78095	5.93789	7.52773	10.2586	6.03984	5.83191	5.76169	5.74768	5.80087	5.79716	5.77515	5.79242
miR-217	5.8093	5.84883	5.73401	6.0725	5.77082	5.75354	5.77022	5.80321	6.79659	9.27898	5.92487	5.77916	5.75629	6.13234	5.82555	5.79968	5.78444	5.80598
miR-218-5p	5.98082	5.87667	6.94362	6.28082	7.16131	6.45321	5.92079	5.8489	6.97336	6.47331	5.79024	5.81395	5.81598	5.87406	5.83284	5.75923	5.82058	5.75346
miR-219-5p	5.91538	5.89797	6.10876	5.43911	5.97721	6.0382	6.37653	6.02582	6.13479	6.36819	5.45503	6.51733	6.18533	5.998	5.96086	5.94295	5.93959	5.94364
miR-221-3p	9.84139	9.48512	9.64317	9.4773	9.87832	10.1122	8.22492	6.86178	7.14962	6.74437	7.79732	6.31467	8.39155	7.8097	6.92181	7.06631	7.74928	7.67755
miR-222-3p	7.60929	9.64762	7.62448	9.11045	10.4104	8.24043	8.02365	7.20004	6.95729	6.68274	7.06638	6.80544	7.4013	9.88517	7.80263	8.37332	8.96014	8.83922
miR-223-3p	5.8931	6.82252	6.96434	6.33517	5.92127	6.01938	6.47485	6.0263	8.21583	7.01586	12.8048	9.07758	12.075	12.0065	8.08035	10.1365	10.1867	9.9938
miR-22-3p	9.65842	10.8299	10.721	10.8226	10.9141	10.2347	10.0535	10.814	8.83362	9.50262	7.21175	9.11356	9.24848	9.76547	7.40803	8.10279	7.2953	7.69304
miR-224-5p	6.09132	7.00244	8.14546	6.71141	6.19808	7.93382	8.09287	6.69829	6.65583	6.22671	5.92025	5.85512	6.24585	5.98092	5.89286	5.9909	5.79873	5.77778
miR-23a-3p	10.8048	11.3293	10.3302	10.5519	10.359	11.2932	10.5176	9.5239	10.4339	9.2602	10.8383	7.00332	10.0143	10.8236	8.1261	8.59769	8.45007	9.25735
miR-23b-3p	10.5	9.04761	10.0429	8.61111	8.39503	9.58947	9.7938	10.3591	10.3808	10.333	6.15263	7.01397	8.76123	7.91034	7.03989	7.76601	7.20477	7.16707
miR-24-1-5p	5.96408	5.85665	6.00615	5.90101	5.99192	6.23082	6.18901	6.30936	5.94481	5.99051	5.77959	5.71833	5.89866	5.80614	5.73117	5.78265	5.72973	5.72057
miR-24-3p	10.4951	10.8638	10.8849	11.3987	10.7028	10.8815	10.6246	10.2733	10.2221	9.9617	9.98465	8.06291	9.99409	11.0749	8.11356	9.31808	8.69349	8.96786
miR-25-3p	7.01704	8.54975	8.02792	8.67527	8.86884	7.43507	7.58107	8.43607	7.59766	7.64612	8.07502	9.92363	8.93072	8.70077	10.024	9.07563	9.42244	9.51629
miR-26a-5p	9.08647	9.68077	8.54887	9.38911	8.36683	9.60357	9.58109	10.2132	10.8696	10.7299	10.3818	8.8347	10.7217	9.00398	9.51238	9.38546	10.1514	10.337
miR-26b-5p	9.22958	8.30346	7.6269	7.00247	8.09194	8.83238	8.86504	10.4939	10.086	10.0895	10.1927	9.55185	10.1603	7.59097	9.69336	9.87238	10.4557	10.1653
miR-27a-3p	9.64736	10.2217	10.9585	10.9792	10.8366	11.3902	10.1693	8.35446	8.48231	8.03698	10.4828	6.76833	9.94176	10.183	7.49457	7.96168	7.89007	8.10214
miR-27b-3p	9.98645	8.88455	9.74298	8.78743	8.98807	9.74208	9.51423	9.86337	9.61186	10.2445	5.9783	6.63747	8.54114	7.03484	6.69228	6.37383	6.95453	6.57262
miR-28-5p	6.40496	6.36213	8.0845	7.11729	6.27132	7.15936	6.90494	7.92132	6.76818	6.8325	5.98409	6.34269	7.49268	6.22173	9.20044	8.28482	8.0137	7.49466
miR-296-5p	5.90345	6.21746	7.28238	5.79275	6.32728	6.11759	5.8896	6.15455	5.95462	6.00658	6.02337	6.75721	6.06412	5.49353	6.0742	6.20974	6.09348	6.12034
miR-299-3p	5.97966	6.09786	5.98111	6.11095	6.37028	6.24951	5.91144	5.809	5.92175	5.9612	5.7611	5.78723	5.84506	5.83987	5.90607	5.82307	5.87386	5.93503
miR-299-5p	6.23361	5.92625	7.07171	6.77993	7.20479	6.58718	5.77071	5.73707	6.06838	6.17672	6.95924	5.95493	6.13483	5.86687	5.74035	5.77229	5.73454	5.75728
miR-29a-3p	9.99256	10.075	10.7074	10.7185	11.1916	10.8222	10.0823	10.6774	9.79859	9.87996	10.034	7.15784	10.0167	9.14575	10.3059	10.4041	10.9764	10.8024
miR-29b-3p	8.98801	9.14767	9.76835	9.01658	10.9499	10.3067	9.65503	9.29213	9.00097	9.38422	8.72982	8.17653	8.82639	7.10505	8.92225	8.43365	9.62086	9.07557
miR-29c-3p	9.14302	8.39356	8.23104	8.27839	7.60039	9.3908	9.29125	9.33236	9.73689	10.6107	8.20775	8.82541	9.11516	7.27752	9.00765	9.47361	10.0016	10.0695
miR-301a-3p	6.30419	5.99399	6.07372	6.06096	6.66332	6.7943	6.70395	5.92012	6.22063	6.18417	6.21892	7.94555	7.12744	6.44276	6.96035	6.95824	6.57379	6.18242
miR-302a-3p	5.84269	5.9935	6.16487	5.90744	5.92049	5.90365	5.88708	5.97755	5.84213	5.91153	6.80612	5.94774	5.86516	5.74504	5.95161	5.91158	5.96827	5.93377
miR-302a-5p	5.82984	5.82038	5.85398	5.84421	5.82958	5.7955	5.81921	5.77687	5.83488	5.83896	5.92281	6.01385	5.81603	5.83822	5.84779	5.77652	5.86462	5.81533
miR-302b-3p	5.8136	5.82348	5.9785	5.9197	5.78861	5.88841	5.81818	5.88923	5.84001	5.87191	6.01806	5.81382	5.85578	6.4757	5.85993	5.9174	5.89494	5.94363
miR-302b-5p	5.79361	5.82224	5.88968	5.87411	5.79081	5.79668	5.83761	5.79881	5.79992	5.84343	5.82441	5.76574	5.79865	6.11727	5.8066	5.87159	5.84504	5.7971
miR-302c-3p	5.80014	5.8313	5.98396	5.79864	5.80912	5.81979	5.82022	5.85365	5.80331	5.81613	6.01945	5.91054	5.85282	5.91723	5.81413	5.78094	5.79412	5.84716
miR-302c-5p	5.83354	5.92336	5.76781	5.72744	6.07517	5.76444	5.79148	5.7781	5.76146	5.75792	5.74437	5.79835	5.78157	5.84076	5.80334	5.8959	5.79284	5.78885
miR-302d-3p	5.79507	5.80402	5.85415	5.91679	5.80405	5.801	5.83763	5.84089	5.77948	5.81269	5.85397	5.78285	5.82727	5.83136	5.73313	5.81205	5.93139	5.9811
miR-30a-3p	6.36898	6.7648	7.62069	7.03998	6.30361	6.15595	6.69642	6.82101	6.60297	6.89654	5.85748	5.754	5.81384	5.77691	5.95903	5.90965	5.76233	5.72813
miR-30a-5p	8.33079	10.376	8.33079	9.40466	8.19902	7.51643	8.71717	7.97278	8.49498	9.1201	6.14675	5.94069	6.2356	6.44295	6.69906	6.84453	6.08003	5.90416
miR-30b-5p	7.16626	8.17394	5.54959	6.86356	7.27152	7.17978	8.78351	8.91701	8.38985	9.30448	7.00569	8.39385	8.82426	6.8977	9.2602	8.45483	9.26469	9.0763
miR-30c-5p	6.68492	7.60521	6.60288	7.38175	7.03014	6.50197	8.43984	7.78046	7.64588	8.54953	8.30023	8.10145	8.54534	8.98623	8.39787	8.89928	8.69534	8.64835
miR-30d-5p	7.78528	8.9962	6.44956	7.55696	7.71499	6.71027	7.82854	8.54069	7.1027	7.77866	6.20381	7.89586	8.2792	8.84589	8.07518	8.81519	8.22978	8.05449
miR-30e-3p	6.63394	6.64951	6.31092	6.32985	6.16808	6.37428	6.75608	7.30214	6.45406	6.6999	6.14075	6.36941	7.21575	6.03917	6.93383	7.04544	7.23627	7.11087
miR-30e-5p	7.68023	6.58883	5.81589	6.74059	6.28076	7.3717	8.28373	8.04834	7.70937	8.27837	6.1923	8.62339	8.14792	7.69108	8.59998	9.51698	8.86957	8.37517
miR-31-5p	8.10331	6.19473	10.1529	7.58962	9.28996	9.04083	9.52758	6.14153	7.29407	5.99412	6.35541	5.79235	6.55804	6.30787	5.84959	5.85906	5.82324	5.90478
miR-320a	7.45987	8.70488	7.74179	8.07437	8.60364	7.25108	8.02474	8.51054	7.42413	7.14535	6.2303	8.5602	7.87237	8.45636	7.68687	8.21892	8.61372	8.55486
miR-323a-3p	5.92996	5.84712	6.09043	5.96245	6.22039	6.02599	5.78017	5.76239	5.86617	5.88584	5.78113	5.85034	5.86431	5.65878	5.77949	5.75708	5.77932	5.76351
miR-323b-5p	5.80984	5.76403	5.83528	5.67903	5.85132	5.80176	5.82404	5.98814	5.81021	5.8137	6.33963	5.79531	5.79818	5.92112	5.81078	5.79204	5.84196	5.83418
miR-324-3p	9.54697	9.89521	8.17926	9.22845	9.75966	7.00739	9.15539	8.37984	6.76909	7.08022	9.24889	8.71023	7.862	10.1951	10.0146	8.64519	9.80212	10.3315
miR-324-5p	6.77769	7.09761	6.69064	7.54545	7.07777	6.75905	6.98325	6.19052	6.3739	6.26488	6.24266	7.28188	7.04465	7.62528	6.914	6.43256	6.62159	6.23402
miR-325	5.78115	5.84068	5.77844	5.76122	5.77573	5.78276	5.85722	5.8242	5.80061	5.78429	5.85633	5.80375	5.77752	6.02822	5.81171	5.85532	5.792	5.83027
miR-32-5p	6.18192	5.75199	6.03396	5.76282	5.85254	6.43731	6.57947	6.13173	6.12937	6.13677	5.77985	7.18905	6.30259	5.89758	6.39782	6.07293	6.44168	6.0724
miR-326	5.80696	5.86984	6.14469	5.97362	5.85109	5.91201	5.78598	5.85098	5.91451	5.85484	6.34844	5.96987	6.29533	5.87535	5.78569	5.83781	5.78011	5.75319
miR-328	5.86315	5.8085	6.26035	5.86444	6.22965	5.94214	5.86824	6.10616	6.11593	6.09298	10.1503	6.24351	6.16166	5.6817	5.82436	5.80091	5.95531	5.92055
miR-329	6.05711	5.87512	6.22439	6.20769	6.21929	6.07358	5.79297	5.79196	5.91929	5.93613	6.07474	5.78066	5.98167	5.90059	5.79436	5.76019	5.78008	5.76998
miR-330-3p	5.92183	5.79375	5.8006	6.15483	5.95075	5.86509	6.05798	5.91993	5.92094	5.80179	6.2298	6.45568	6.17015	6.1415	6.17929	6.1857	6.22661	6.3962
miR-331-3p	7.09719	7.57533	9.20047	8.90254	7.16586	7.46667	7.64826	8.03948	7.33878	7.35388	7.18522	8.48107	8.37826	9.62926	9.25749	9.57751	8.48248	8.38257
miR-335-5p	8.64571	5.65968	5.91928	6.33278	5.74351	6.15923	6.15004	6.18733	6.55412	7.22357	6.19337	6.04966	6.83765	6.34086	6.16161	5.92929	6.1764	6.02468
miR-337-3p	6.71287	5.84144	6.5081	6.09726	5.91444	6.64479	5.84599	5.97822	5.99729	6.02942	6.16704	6.02243	6.15241	5.74919	5.80793	5.77359	5.84694	5.81779
miR-338-3p	5.74683	6.15809	5.79278	5.68597	6.09607	5.7731	5.77783	6.20743	7.64185	8.56946	9.09876	5.92633	7.10692	5.74983	5.90877	5.88603	5.83658	5.93794
miR-339-5p	6.28294	5.95537	6.22113	6.11286	5.72114	6.22349	6.19122	6.1616	6.19437	6.17011	6.11233	6.3582	6.35593	6.23153	6.44547	6.16062	6.70387	6.64276
miR-33a-5p	6.16515	5.66159	5.92579	6.16448	6.01337	6.44961	6.72054	6.36695	6.19648	6.0963	6.27505	6.32066	6.18334	6.17113	6.25142	6.21358	6.40485	6.0832
miR-33b-5p	5.79585	5.90771	5.79063	5.82691	5.78206	5.83661	5.94585	5.91373	5.79676	5.7871	5.87222	5.78855	5.77782	6.16161	5.76607	5.86155	5.78602	5.79612
miR-340-3p	5.87416	5.87553	5.98712	6.26199	5.87615	6.00447	6.11523	6.22212	5.93516	5.96024	6.13742	6.10834	6.94884	6.20378	5.88253	6.03695	5.96429	5.83916
miR-342-3p	5.98078	7.13419	6.64019	6.97511	6.92379	6.65721	7.00373	6.52277	6.92093	6.62588	6.20212	6.07699	9.4808	11.2898	8.80622	9.37287	9.71548	9.87811
miR-345-5p	6.07835	6.72285	5.88094	5.99962	6.00056	6.03916	6.09366	6.67367	5.92944	5.8938	6.06716	5.9994	6.01224	6.04838	6.37091	6.47408	6.31713	6.47629
miR-346	5.77801	5.76893	6.19235	5.89845	5.83653	5.90328	5.74574	5.75571	5.82523	5.83268	7.01519	5.89572	5.89336	5.77578	5.74971	5.75524	5.74741	5.74903
miR-34a-5p	8.73235	8.44105	9.33544	10.0888	8.97555	9.22904	9.45236	9.6506	10.0868	9.09415	7.66178	5.97171	6.16746	7.62607	6.54224	6.64922	6.37919	6.4995
miR-34b-5p	7.72863	6.86486	6.10092	6.5218	6.50159	7.32572	8.86218	7.4986	7.3685	7.01495	6.93301	5.89928	5.94653	6.0576	6.00286	6.26315	5.99186	5.96738
miR-34c-5p	6.26346	5.76201	5.89768	5.90639	6.11222	6.36885	8.23361	5.97901	5.91281	5.88021	6.01564	5.84061	5.82783	6.27219	5.85375	5.8502	5.91704	5.83127
miR-361-5p	6.65593	7.2545	7.17765	7.71018	6.96628	7.13469	6.9893	7.02851	7.06163	6.94079	6.29656	6.14584	7.44383	7.54729	6.71775	7.02332	7.52701	7.24579
miR-362-5p	6.82373	5.95044	6.08513	6.72457	5.93304	6.19652	6.21702	6.14718	6.09124	5.95074	6.26908	6.99327	6.32907	6.27207	5.99106	6.17781	6.09459	5.94105
miR-363-3p	5.711	5.89607	5.81085	5.89054	5.87723	5.77704	5.95068	5.75247	6.14192	6.10831	5.93079	9.0662	7.79527	9.51401	8.29217	7.99016	8.58731	7.61309
miR-363-5p	5.77539	5.87204	5.78344	5.76252	5.75611	5.77952	5.81258	5.80506	5.79703	5.81438	5.77597	5.8079	5.78709	6.3346	5.84491	5.80049	5.82332	5.81203
miR-365a-3p	8.82015	7.3724	8.86343	8.31173	7.60834	9.07455	7.45492	9.12683	7.25011	8.9452	5.67257	6.36774	6.35434	6.76648	7.63315	6.82382	6.60649	7.33934
miR-367-3p	5.78194	5.94756	5.75463	5.79168	5.94585	5.81291	5.84626	5.78372	5.78566	5.81072	5.92899	5.85651	5.7762	6.29848	5.87248	5.76948	5.87175	5.92098
miR-369-3p	6.78062	5.94494	5.84031	5.77326	5.8983	6.0661	5.92031	5.90985	5.88817	5.94813	5.82027	5.83845	5.86331	6.07591	5.89483	5.95496	5.90003	5.92648
miR-369-5p	6.23999	5.89185	6.34432	6.11082	6.01806	6.18655	5.82318	5.90543	5.95062	6.01011	5.83122	5.86568	6.01519	6.11388	5.84154	5.78977	5.88422	5.87891
miR-370	6.68551	8.81775	6.82493	6.57521	6.79316	6.67268	6.5428	6.75384	6.54124	6.41839	6.0774	6.41204	6.47085	6.34138	6.77896	6.89603	6.69651	6.87213
miR-371a-3p	5.78259	5.88302	5.92862	5.96365	5.8623	5.85079	5.79115	5.81595	5.82378	5.83923	6.06227	5.77188	5.8464	5.85595	5.79776	5.77159	5.8585	5.87989
miR-372	5.77718	5.84667	5.8876	5.74218	5.87392	5.77258	5.77251	5.82975	5.74599	5.74842	5.73249	5.74728	5.78939	6.05001	5.75609	5.76916	5.76486	5.76634
miR-373-3p	5.83645	5.98054	5.77882	5.78138	6.01652	5.77836	5.86399	5.91373	5.79356	5.80926	6.88213	5.8855	5.75442	6.10615	5.8656	5.92547	5.87231	5.90623
miR-373-5p	6.0569	5.95275	5.76296	5.79862	6.00273	5.89062	5.97704	6.11199	5.72692	5.71255	5.70842	5.98952	5.78398	5.77843	5.74442	5.94225	5.81862	5.93776
miR-374a-5p	7.97495	7.34459	6.4374	7.85459	6.96046	7.98523	7.69387	7.92955	7.07763	7.27399	6.17626	9.17177	8.47624	7.12164	8.06306	7.47013	8.72137	7.92901
miR-375	5.67436	5.89513	5.67326	5.7604	5.90915	5.67455	6.03008	7.05097	8.56119	10.5911	5.71265	5.67326	5.70742	5.84893	5.69766	5.73291	5.70687	5.71183
miR-376a-3p	8.44123	6.91812	8.73446	7.8762	8.3581	8.44026	6.10045	5.81448	6.91313	7.30953	6.16987	5.84668	6.84541	6.44365	5.82416	5.79066	5.82969	5.79504
miR-376a-5p	6.23936	5.85552	6.22332	5.99749	5.8801	6.51739	5.81235	5.75593	5.85267	5.8956	6.02211	5.87321	6.08266	5.79016	5.81792	5.78738	5.82866	5.80314
miR-376b	6.70558	6.12096	6.14387	6.10242	6.77569	6.75591	5.92065	5.83368	5.96423	6.02751	5.88771	5.90797	5.98931	5.98001	5.85697	5.81597	5.8442	5.85687
miR-376c	7.70756	6.92019	8.77412	7.65179	7.20578	8.47568	5.99152	5.63046	6.68899	7.2019	5.56491	5.61218	6.78028	5.70342	5.60394	5.64309	5.62669	5.6223
miR-377-3p	7.34716	5.92169	7.21319	6.87481	7.79319	8.53111	6.09227	5.83941	6.46441	6.93126	5.93641	5.90147	6.58638	5.97313	5.8312	5.81194	5.85641	5.822
miR-378a-3p	6.80026	6.96891	5.85306	6.74019	5.7126	6.05465	7.17302	7.35346	6.18765	6.15968	6.48084	6.39117	6.80942	6.52044	6.66926	7.07571	6.45586	6.85929
miR-378a-5p	5.79536	5.97783	5.75726	6.07907	5.78086	5.7637	6.24937	6.39672	5.86012	5.7914	5.92434	5.97102	5.96255	5.94684	5.85462	6.15068	5.85875	5.96609
miR-379-5p	6.41589	6.08145	7.43484	6.96028	6.85316	7.04209	5.97411	5.89654	6.11002	6.21182	5.95775	5.92428	6.14636	6.19685	6.01288	5.80976	5.91192	6.02778
miR-380-3p	5.91646	5.97803	5.89545	5.89088	5.91946	5.94088	5.89864	5.98462	5.86939	5.87199	5.94291	5.89991	5.85945	6.0242	5.91539	5.8649	5.93728	5.85804
miR-380-5p	5.78237	5.78135	5.7875	5.76462	5.76581	5.78044	5.76541	5.91509	5.76601	5.76233	5.82355	5.79949	5.76865	5.79685	5.77463	5.75534	5.75551	5.75646
miR-381	6.629	6.12023	7.52366	6.79906	6.7494	6.95742	5.81365	5.68193	6.03303	6.39195	6.5293	5.77087	6.13138	5.78091	5.67343	5.68536	5.68418	5.67427
miR-382-5p	6.16365	6.06751	6.13563	6.36146	6.3091	6.20657	5.90916	5.75737	5.94653	6.02058	7.43417	5.76339	5.99656	5.92387	5.83164	5.78327	5.84939	5.91424
miR-383	5.84613	6.00595	5.82167	5.74312	5.88387	5.73139	5.85879	5.78497	5.79506	5.73387	6.87364	5.73971	5.726	5.7694	5.76089	5.82527	5.88329	6.08848
miR-384	5.786	5.82782	5.89974	5.77053	5.80762	5.81138	5.8477	5.85097	5.80956	5.81822	5.79162	5.78881	5.79543	5.82309	5.80802	5.84676	5.82658	5.91066
miR-409-3p	6.11137	6.50626	7.97294	7.21105	7.43164	6.49637	5.89947	5.78605	6.00364	6.02631	5.80459	5.94066	6.31873	5.83949	5.70167	5.74928	5.72007	5.69143
miR-409-5p	5.93735	5.84863	6.34939	6.29779	6.02195	6.1601	5.77707	5.79841	5.89521	5.89611	5.80549	5.94526	5.98974	5.87369	5.78473	5.75878	5.76768	5.74524
miR-410	6.20186	6.04344	8.26195	6.87131	6.89854	6.84596	5.84759	5.79033	5.9396	6.00394	5.78755	5.83324	6.56496	6.06331	5.74583	5.7445	5.74395	5.7684
miR-411-5p	6.28792	5.96055	6.391	6.20476	6.3119	6.3736	5.80994	5.77223	6.02049	6.10675	6.0551	5.94215	5.95547	6.00767	5.78232	5.77755	5.78023	5.77341
miR-412	5.76684	5.81791	5.78095	5.75263	5.77985	5.78081	5.76546	5.81952	5.77899	5.79359	5.74923	5.76684	5.78738	5.73422	5.76634	5.77729	5.76507	5.76574
miR-421	5.89116	5.98883	6.00718	5.9162	6.40352	5.91755	6.1226	5.95895	5.87393	5.82157	5.82668	5.97069	6.06226	6.24986	6.0368	6.26549	6.00474	5.87837
miR-422a	5.99411	5.80083	5.6977	5.7611	5.92439	5.6977	5.82032	5.99976	5.72778	5.70684	5.8309	5.86221	5.72131	5.97612	5.90512	5.99319	5.86051	5.86021
miR-423-3p	5.9697	5.81267	5.81405	6.19993	5.93071	5.95643	6.05587	6.10789	5.94116	5.89511	5.86046	6.25894	6.17164	6.10828	6.18039	6.21309	6.24966	6.22741
miR-424-5p	11.1218	6.88187	7.20391	8.51807	8.74717	11.1312	6.03029	5.87828	6.96771	6.95286	7.33123	7.18002	7.08449	6.19225	6.1531	5.96089	5.91229	6.01282
miR-425-3p	5.89676	6.05051	7.37566	6.22026	5.99613	5.9589	6.003	6.34843	5.87313	5.98342	6.79032	6.71826	6.1706	6.11159	6.33276	6.62059	6.35097	6.49424
miR-425-5p	6.38959	6.84623	6.54309	7.36768	6.51845	6.45125	7.75178	6.78004	6.43148	6.46377	7.37685	8.75117	8.20194	9.08945	8.77575	8.77257	8.35549	8.3555
miR-429	5.7616	5.871	5.76069	5.73216	5.83906	5.79767	8.8891	6.21564	7.18062	7.521	5.71446	5.78215	5.78612	5.73852	5.77689	5.88016	5.824	5.77481
miR-431-5p	5.92184	5.82216	6.43566	6.50259	6.36658	6.18914	5.77626	5.78309	5.79882	5.79451	5.90508	5.97584	6.27354	5.88855	5.82582	5.93508	5.94216	5.91538
miR-432-3p	5.77158	5.75633	5.91101	5.89354	5.8413	5.8098	5.77119	5.78782	5.81297	5.81204	7.00336	5.75609	5.85984	5.91651	5.76341	5.78251	5.76979	5.78439
miR-432-5p	5.90175	6.10445	6.61267	6.26304	6.56253	6.07481	5.83589	5.69224	5.85273	5.85472	8.72067	5.97796	6.10115	6.13582	6.29433	5.75099	6.52721	6.81031
miR-433	5.80107	5.81139	5.83339	5.8918	5.9306	5.78636	5.76268	5.76222	5.79716	5.77659	5.80128	5.83073	5.79865	5.79994	5.75564	5.76302	5.7604	5.75914
miR-448	5.78199	5.82064	5.92197	5.81538	5.77286	5.81178	5.81351	5.79646	5.77153	5.78139	5.7956	5.80753	5.8037	5.89877	5.80113	5.84879	5.83361	5.80595
miR-449a	5.83863	5.92091	5.86175	5.81696	5.80113	5.89786	9.90988	5.93616	5.9192	5.85595	5.87218	5.95399	5.82494	5.79737	5.92672	6.0427	5.87828	5.92616
miR-449b-5p	5.77804	5.89616	5.84837	5.77108	5.80675	5.77972	6.68803	5.7608	5.76651	5.79734	6.19978	5.81181	5.80333	5.77049	5.80244	5.9474	5.8209	5.82399
miR-450a-5p	8.39962	6.02372	5.83695	6.18734	5.9873	7.18033	5.85277	5.79039	6.04653	5.97734	6.16539	5.81846	5.95717	5.98219	5.87986	5.80923	5.91779	5.86043
miR-451a	4.95289	7.45278	5.116	5.36826	7.38429	5.11184	4.82963	5.22231	9.90987	8.39831	5.56064	11.0726	10.0041	5.42168	5.36854	6.42518	5.88929	7.69618
miR-452-3p	5.78348	5.79664	5.78848	5.76977	5.79815	5.78348	5.79958	5.97268	5.78348	5.78332	5.83128	5.79477	5.7839	5.88887	5.80297	5.85204	5.80857	5.84337
miR-452-5p	6.07033	6.90954	5.8931	5.90688	6.23291	6.51114	6.63563	5.88457	6.19755	6.04478	5.90851	5.89471	5.88343	5.89009	6.0175	5.91008	6.02025	6.00805
miR-454-3p	6.0095	6.41714	5.91303	6.03387	6.54468	6.13093	6.32259	6.18848	6.27729	6.20913	6.04809	7.3732	6.69066	5.94809	6.84959	6.66139	6.78231	6.51198
miR-454-5p	5.80376	5.90555	6.07773	5.8441	5.95536	5.92976	5.83245	5.81831	5.91964	5.93605	6.24253	5.89082	6.00235	5.77365	5.87612	5.77839	5.90054	5.86841
miR-455-5p	6.14547	5.71434	5.92298	6.08798	5.98756	6.24603	6.34859	6.69637	6.32204	6.45817	5.82813	5.87865	5.88867	6.05432	6.07994	5.87286	5.88404	5.8498
miR-483-3p	5.88331	5.97043	6.45485	5.64168	6.33769	5.92203	5.75111	6.29292	6.04757	6.00854	10.0017	6.26663	5.99073	5.39525	5.77094	5.82398	5.82773	5.81839
miR-484	6.13409	7.0322	6.50843	6.63565	6.55061	6.09508	6.33122	6.53675	6.09854	6.08055	6.479	7.72634	6.96559	8.06937	6.68775	7.02898	6.99434	6.80049
miR-485-3p	5.84626	5.92141	6.204	6.02017	6.26161	5.97784	5.7783	5.80565	5.99892	5.97834	9.32356	6.03585	6.06246	5.70857	5.75368	5.74613	5.76127	5.78616
miR-485-5p	5.85305	5.82971	5.81033	5.75127	5.91003	5.8765	5.77926	5.75756	5.82619	5.82652	5.73851	5.79703	5.79177	5.84693	5.7947	5.75594	5.76252	5.79365
miR-486-5p	5.69778	6.3455	5.73783	5.7614	6.48814	5.65358	5.65772	5.71305	6.13614	5.78033	5.78227	10.2733	6.9614	5.67371	6.51105	6.93786	6.50543	6.52325
miR-487a	5.96123	5.87691	5.91777	6.08064	7.01165	6.03981	5.83957	5.77131	5.89138	5.84983	5.89024	5.79961	5.92246	5.96456	5.81195	5.8046	5.79255	5.83319
miR-487b	6.87703	6.31107	7.02399	7.0263	8.95003	6.4062	6.73748	6.16303	6.16129	6.39866	6.30358	6.5562	6.47753	5.89714	6.76166	5.9829	6.86589	6.90844
miR-488-5p	5.79537	5.80118	5.90956	5.79645	5.80082	5.7948	5.7856	5.78552	5.79113	5.796	5.81708	5.81585	5.81913	5.78046	5.78676	5.81347	5.77434	5.79345
miR-489	5.95864	5.82475	5.96086	5.74027	5.81805	5.84236	5.79224	5.85305	5.89064	5.87095	5.78643	5.80148	5.81696	5.83612	5.85849	5.9563	5.91407	5.85155
miR-490-3p	5.74063	5.83355	5.76209	5.78846	6.03471	5.74095	5.75052	5.77613	5.78548	5.73495	5.82651	5.75676	5.7801	5.86555	5.74949	5.78279	5.74337	5.77988
miR-491-5p	5.9279	5.87318	5.85402	6.03492	5.95458	5.85094	5.84441	5.99853	5.94503	5.86571	6.09944	5.91485	5.89708	6.02298	5.84131	5.85456	5.84039	5.83181
miR-492	6.0041	5.86032	5.79334	5.93002	5.96416	5.89943	5.93016	5.95577	5.84567	5.79657	5.75584	5.78767	5.78675	6.31386	5.77206	6.05143	5.78692	5.81563
miR-493-3p	5.90932	5.8548	5.7822	5.81451	6.21476	5.86172	5.78104	5.90678	5.80208	5.76898	6.38081	5.85105	5.79081	5.90074	5.85953	5.87444	5.7782	5.80182
miR-493-5p	6.2337	5.91526	6.91132	5.98	7.28243	6.89546	5.95092	5.83093	6.09223	6.14391	5.83199	5.9037	6.22161	5.91504	5.85868	5.88016	5.84565	5.89944
miR-494	9.27744	11.6906	9.96203	10.0737	7.9243	8.46847	7.23166	9.93536	7.14022	8.53491	5.50797	7.32639	6.59863	9.18755	9.7034	10.2794	8.86506	9.59072
miR-495	6.50009	6.03948	6.9816	6.33344	6.2285	6.6713	5.88361	5.77178	6.19233	6.21543	5.55946	5.84104	6.30273	5.57563	5.76784	5.76746	5.83622	5.7625
miR-496	5.87995	5.81691	5.88553	5.80443	5.79204	5.87631	5.77768	5.81836	5.75915	5.7803	5.82185	5.79439	5.85627	5.92664	5.75493	5.78014	5.783	5.78184
miR-497-5p	5.47584	7.02563	5.43031	6.59783	6.57223	6.64455	5.43141	6.76063	6.94488	7.18585	5.68391	5.36829	5.68732	5.62974	6.18318	5.56416	5.95197	5.49609
miR-498	5.91678	6.19405	5.77602	5.82093	6.14272	5.86168	5.92999	5.94499	5.8381	5.84805	5.91526	5.78727	5.81992	5.81305	5.85349	6.0918	5.93935	5.9939
miR-499a-5p	7.15589	5.99065	5.78644	5.71919	5.82979	5.83887	5.94375	6.12285	5.94999	5.93462	6.1377	5.8363	5.81614	6.31777	5.79873	5.84626	5.95873	5.82892
miR-500a-3p	6.29284	5.97329	6.13639	6.28245	5.90069	5.98162	6.20304	5.9508	6.16398	6.0634	6.04619	6.72989	6.13477	6.1383	6.11371	6.1342	6.21661	6.15882
miR-501-5p	6.17063	6.27893	5.86932	6.09664	6.10813	5.91371	6.29931	6.45469	5.94888	5.93172	5.97076	7.07095	5.96583	6.70628	6.77255	6.21775	6.72135	7.07315
miR-502-5p	5.98845	5.85256	6.01238	6.09105	5.94444	6.01979	6.0434	5.92064	5.98492	5.96793	6.53973	6.50244	6.01057	5.96031	5.96562	6.00624	5.98999	6.04165
miR-503	7.66689	6.1587	5.8432	6.96033	6.30744	7.44637	5.76948	5.73576	5.77712	5.7337	5.89807	5.71583	5.89409	6.02583	5.77998	5.83198	5.94304	6.00073
miR-504	5.88675	5.66666	5.84613	5.97803	5.73723	5.83076	5.80528	5.83421	5.84636	5.86438	6.0059	5.89448	5.91011	5.94571	5.83275	5.79432	5.83739	5.79694
miR-505-3p	5.83595	6.38884	6.49876	6.68745	6.07444	6.06061	6.09171	6.68344	6.02624	5.93433	6.23599	6.17281	6.45264	6.56531	6.15133	6.11178	6.44561	6.30026
miR-506-3p	5.88558	5.64675	5.92162	5.85653	5.77958	5.91247	5.9208	5.88526	5.85183	5.89758	5.81392	5.99796	5.90086	5.84585	5.97728	5.86376	6.05083	6.06855
miR-507	5.78426	5.82794	5.81498	5.87159	5.83027	5.81555	5.81541	5.79565	5.799	5.8402	5.80242	5.80122	5.79894	5.94529	5.86144	5.86271	5.86522	5.83681
miR-508-3p	5.79423	5.86664	5.74763	5.81131	6.01695	5.75153	5.94393	5.88702	5.76888	5.77168	5.79671	6.10795	5.76045	5.92526	6.03441	5.85233	6.00811	6.12252
miR-509-3p	6.04872	6.33945	6.12273	5.83183	6.18434	6.06782	6.09753	6.14808	6.05325	6.05325	6.12854	6.0936	6.07081	5.90605	6.0867	6.14589	6.06852	6.14685
miR-510	5.94708	5.81603	5.91498	5.79457	5.76685	5.89591	5.95102	5.95772	5.92488	5.9018	5.80254	5.9186	5.91256	5.86794	5.93609	5.90088	5.9537	5.94936
miR-511	5.78069	5.86104	5.80623	5.7712	5.81264	5.80414	5.79533	5.76181	5.80968	5.82868	5.81218	5.82276	5.7971	5.83233	5.83234	5.81636	5.82373	5.8343
miR-512-3p	6.40317	5.79933	5.88508	5.91388	5.89161	5.86623	5.97368	5.80002	5.91514	5.88498	6.01944	5.76968	5.91926	6.46495	6.03855	6.15922	6.27217	6.42557
miR-512-5p	5.83041	5.80211	5.78554	5.79437	5.90904	5.80511	5.81085	5.89499	5.8089	5.78662	5.79509	5.9802	5.80663	5.80488	5.79986	5.79159	5.8439	5.79845
miR-513a-5p	6.91502	11.1015	5.92342	6.76557	6.70476	6.09998	6.51444	7.49111	5.97137	6.00046	6.20296	6.22522	5.97443	7.89076	8.86624	7.87848	7.99787	8.69887
miR-514a-3p	5.96138	5.65582	5.87897	5.81394	5.63788	5.91395	5.94145	5.95665	5.88269	5.88466	5.78165	6.03129	5.87764	6.02951	6.08478	5.89246	6.0217	6.09563
miR-515-3p	5.82495	5.88961	6.13009	5.95063	5.83149	5.82029	5.85423	5.79142	5.84964	5.90686	6.76057	5.85979	5.89806	5.78308	5.80781	5.85378	5.9452	5.86161
miR-515-5p	5.78596	5.82093	6.00256	5.76069	5.81884	5.89744	5.76489	5.79047	5.84106	5.85216	5.98676	5.90825	5.7985	6.28046	5.77308	5.77909	5.88156	5.76749
miR-516b-3p	5.79486	5.8125	5.80774	5.82111	5.86186	5.80704	5.77655	5.75965	5.76781	5.77195	5.81601	5.77083	5.80357	5.80424	5.77618	5.88761	5.78355	5.81817
miR-516b-5p	5.93459	5.86131	5.77912	5.77994	5.8821	5.76508	5.82223	5.83801	5.77054	5.75804	5.83579	5.781	5.76897	5.98417	5.88249	5.90343	5.9195	5.97874
miR-517-5p	5.8497	5.89478	5.829	5.78366	5.83299	5.77824	5.8187	5.80235	5.78994	5.79618	6.02125	5.77702	5.79438	5.88855	5.78986	5.81489	5.84637	5.84979
miR-517a-3p	5.77434	5.80951	5.79437	5.87356	5.79956	5.83719	5.79819	5.77306	5.8177	5.83141	5.84032	5.83141	5.84299	5.80174	5.79568	5.81572	5.82458	5.83481
miR-517b-3p	5.82936	5.87526	5.90419	5.9649	5.80632	5.84609	5.82886	5.79923	5.86659	5.88988	6.02772	5.87037	5.89638	5.87066	5.82191	5.89811	5.8731	5.82582
miR-517c-3p	5.76654	5.79799	5.85066	5.88977	5.75679	5.82589	5.82246	5.83497	5.77718	5.79361	6.09452	5.80716	5.81945	5.87729	5.80568	5.82841	5.87224	5.84203
miR-518a-3p	5.8125	5.88413	5.83213	5.87202	5.80751	5.92401	5.78786	5.89949	5.81705	5.90708	5.78834	5.88872	5.86613	5.76571	5.84046	5.77183	5.86301	5.78151
miR-518b	5.81788	5.87768	5.97359	5.82462	5.82941	5.90636	5.79188	5.99242	5.78871	5.84423	5.61932	5.84553	5.83968	5.74898	5.83022	5.7932	5.88633	5.83986
miR-518c-3p	5.77502	5.84739	5.84327	5.86565	5.81978	5.85083	5.82127	5.76817	5.79476	5.80898	5.8141	5.76971	5.82923	6.0775	5.7752	5.80023	5.85691	5.78611
miR-518d-3p	5.79807	5.79437	5.95977	5.87233	5.81066	5.89835	5.78158	5.78108	5.81512	5.84041	5.79842	6.05382	5.85207	6.06359	5.85652	5.7813	5.8499	5.85236
miR-518e-3p	5.78912	5.79088	5.81811	5.86593	5.79187	5.84199	5.78923	5.82012	5.83189	5.80944	5.88416	5.81346	5.86	5.84558	5.81286	5.79617	5.80222	5.80478
miR-518f-3p	5.90544	5.87473	5.85202	5.77228	5.79831	5.80864	5.80257	5.79002	5.77234	5.78068	5.7618	5.933	5.80791	5.90708	5.81535	5.79768	5.81521	5.81814
miR-518f-5p	5.92697	5.85435	5.81373	5.84333	5.90415	5.80945	5.84789	5.86119	5.80673	5.81239	5.9615	5.87538	5.83161	6.24595	5.87126	5.83507	5.83475	5.83166
miR-519b-3p	5.80349	5.91214	5.8447	5.90937	5.81575	5.86888	5.86062	5.76553	5.87512	5.91773	5.95474	5.93069	5.82224	6.18013	5.93907	5.82859	5.92528	5.84483
miR-519c-3p	5.80463	5.90132	5.84571	5.83564	5.80488	5.81719	5.89221	5.93794	5.82292	5.85471	5.88063	5.76778	5.80349	5.92036	5.81176	5.8463	5.86954	5.89708
miR-519c-5p	5.82232	5.97484	5.772	5.77463	5.85735	5.7277	5.81583	5.82514	5.75865	5.74075	5.76428	5.88886	5.74652	5.93227	5.81281	5.81982	5.83965	5.90868
miR-519d	5.87679	5.86843	6.06008	5.75439	5.83409	5.9474	5.93607	5.86252	5.84077	5.9071	6.80795	5.93794	5.92779	5.59627	5.81505	5.89734	5.91724	5.88401
miR-519e-3p	5.89857	5.82821	5.96425	5.9865	5.97407	5.84055	5.9407	5.78621	5.8797	5.88949	6.43291	6.16755	5.88477	6.34147	5.92173	5.84126	5.98875	5.86035
miR-519e-5p	6.21308	5.79535	5.80865	5.80716	6.27859	5.79159	6.04991	6.12449	5.78156	5.7764	6.05391	6.59492	5.79959	5.84847	6.29128	5.85393	6.25745	6.29042
miR-520a-3p	5.84386	5.85604	6.0399	5.95827	5.80971	5.91845	5.84548	5.8475	5.89251	5.91454	6.31318	5.88247	5.93215	5.70796	5.85246	5.82879	5.86656	5.91288
miR-520a-5p	5.80134	5.83689	5.79864	5.78483	5.76893	5.76725	5.81348	5.78271	5.76788	5.77923	5.77361	5.77918	5.77705	6.00963	5.81322	5.78109	5.77826	5.79851
miR-520b	5.8369	6.03391	5.74482	5.90197	5.95142	5.83551	5.87737	5.93716	5.79	5.78777	5.81295	5.85704	5.79979	6.22745	5.83788	6.01501	5.87806	5.82934
miR-520c-3p	5.8045	5.87383	5.92009	5.9716	5.82545	5.83739	5.86724	5.95997	5.8099	5.84178	5.90259	5.89492	5.84906	5.90351	5.88881	5.83705	5.8614	5.8583
miR-520d-3p	5.84579	5.86093	5.91674	5.83578	5.94288	5.89741	5.90215	5.88636	5.87774	5.90622	7.41627	5.92253	5.86333	5.70332	5.92808	5.91711	6.05436	5.98438
miR-520e	5.85248	5.84514	5.91309	5.74728	5.90548	5.89288	5.87262	5.97723	5.82911	5.81404	5.84127	5.81283	5.84081	6.39696	5.94674	6.00249	5.9602	5.89542
miR-520f	5.82023	5.94012	5.84371	5.95802	5.84833	5.86688	5.85139	5.93335	5.8563	5.85991	6.27406	5.92467	5.88727	5.87363	6.07466	5.86031	6.1761	6.19009
miR-520g	5.77742	5.86879	5.89945	5.99969	5.76962	5.93216	5.83481	5.8198	5.80724	5.8894	6.39842	5.80733	5.91102	5.93272	5.8122	5.79426	5.89618	5.79897
miR-520h	5.78733	5.80965	5.78979	5.87906	5.79651	5.80317	5.79229	5.77325	5.78179	5.7811	6.15512	5.79515	5.86284	5.91556	5.80875	5.78983	5.77649	5.81662
miR-521	5.77142	5.82833	5.98453	5.95884	5.82144	5.91127	5.80849	5.76668	5.81892	5.91009	6.1537	5.82566	5.90885	5.80743	5.81073	5.7933	5.79993	5.81651
miR-522-3p	5.78521	5.88586	5.89009	5.8578	5.80449	5.81302	5.90346	5.81507	5.80484	5.81982	5.86875	5.79588	5.79564	5.94104	5.8802	5.89927	5.9491	5.94374
miR-523-3p	5.77452	5.82861	5.7638	5.83682	5.74198	5.76461	5.78722	5.74443	5.77686	5.77172	5.91173	5.77341	5.78588	5.78446	5.76822	5.8895	5.76446	5.8019
miR-524-3p	5.78237	5.81132	5.88974	5.82623	5.78396	5.86344	5.82816	5.83239	5.8098	5.82148	5.76095	5.83031	5.84818	5.71739	5.81463	5.8052	5.8171	5.79853
miR-525-3p	5.82221	5.8509	5.92862	5.85367	5.79667	5.8654	5.76701	5.7786	5.82028	5.8079	5.81504	6.03948	5.83006	5.76135	5.78861	5.79023	5.78257	5.79002
miR-525-5p	5.92012	5.96118	5.77918	5.83745	5.91617	5.81581	5.86799	5.81885	5.79703	5.81863	5.87781	6.04261	5.80178	5.96974	5.90901	5.81635	5.8432	5.82439
miR-526a	5.78462	6.07563	5.70614	5.75752	6.15116	5.6466	5.79208	5.89928	5.76623	5.66993	6.09002	5.83569	5.70135	5.79145	6.01028	5.89323	6.01185	6.10343
miR-526b-3p	5.80384	5.9641	5.96962	5.8442	5.8095	5.82438	5.82262	5.86083	5.79083	5.83397	5.82731	5.8623	5.87141	6.07084	5.78292	5.84169	5.81166	5.79228
miR-526b-5p	5.86137	5.82936	5.74668	5.78764	5.97563	5.75326	5.79606	5.74935	5.75721	5.76384	5.89439	5.82547	5.77317	5.85304	5.92766	5.8607	5.88113	5.90209
miR-527	5.8481	5.76176	5.78669	5.76594	6.00474	5.78099	5.79229	5.82039	5.78541	5.77913	5.78209	5.80434	5.80821	5.84686	5.77901	5.80059	5.775	5.78402
miR-532-5p	7.20661	6.12433	6.27062	6.92931	5.92384	6.26179	6.35865	6.08064	6.56355	6.25843	6.0867	7.20621	6.45516	6.13231	6.16116	6.23074	6.32492	6.18845
miR-539-5p	5.96314	5.87354	6.37861	5.95686	5.95429	6.06021	5.88459	5.79917	5.944	5.95751	8.16671	5.91833	5.9216	5.80602	6.00402	5.97459	6.0713	6.02683
miR-542-3p	7.3973	5.93327	5.80866	6.13203	6.20965	7.24176	5.79032	5.79996	5.89401	5.89419	5.93912	5.79419	5.86478	6.77496	5.83604	5.91962	5.78383	5.89343
miR-542-5p	6.46672	5.93796	5.85247	6.23747	6.22589	6.65073	5.80125	5.78544	5.83243	5.78026	6.17402	6.47798	5.89259	6.25992	6.09202	5.93371	6.04562	6.249
miR-544a	5.79589	5.83056	5.90683	5.83699	5.79309	5.81847	5.80132	5.81477	5.81357	5.83346	5.81959	5.76267	5.8336	5.88563	5.83001	5.87436	5.88401	5.8305
miR-545-3p	5.83269	5.82009	5.92157	5.77551	5.90831	6.05427	5.97291	5.87913	5.86508	5.85023	6.3641	6.25565	5.91262	6.12249	5.8511	5.84733	5.97485	5.83319
miR-548a-3p	5.78246	5.84845	5.89301	5.80036	5.78025	5.86443	5.81609	5.8692	5.80336	5.84218	5.76009	5.77356	5.80308	6.00447	5.84016	5.84142	5.80761	5.83504
miR-548b-3p	5.79889	5.82137	5.86115	5.95034	5.79173	5.83433	5.81297	5.95427	5.8324	5.84879	5.94441	5.86738	5.88079	5.88948	5.81963	5.78595	5.80647	5.78585
miR-548c-3p	5.9085	5.82885	6.03435	5.8405	5.83521	5.87347	5.81112	5.90633	5.83942	5.91738	5.81991	5.93269	5.85308	5.89692	5.84993	5.77119	5.79455	5.8502
miR-548d-3p	5.7763	5.89285	5.83474	5.85535	5.79737	5.86042	5.80165	5.8165	5.84842	5.89052	5.84463	5.7903	5.87428	5.96272	5.83384	5.78854	5.87335	5.80571
miR-549	5.78548	5.79883	5.80641	5.79749	5.79308	5.96431	5.7993	5.92389	5.77333	5.78836	5.77048	5.83966	5.7812	5.84618	5.80322	5.80657	5.79634	5.77024
miR-550a-3p	5.86065	5.77568	6.25143	6.14605	5.92668	5.96551	6.04526	5.88886	5.9511	5.98564	7.55432	7.14039	6.01013	5.86236	5.83434	5.94974	5.85851	5.86024
miR-551a	5.79171	5.8065	5.89098	5.75869	5.81528	5.83182	5.78186	5.82116	5.78629	5.79451	5.78739	5.78259	5.85907	5.93104	5.79451	5.75857	5.79056	5.76238
miR-551b-3p	5.82469	5.88471	6.46457	5.6604	6.06199	5.85435	5.80362	6.56292	5.95491	5.93295	5.42879	5.96576	6.25797	5.43792	5.76488	5.88021	5.80963	5.75264
miR-552	5.79046	5.82611	5.78782	5.77575	5.85532	5.79801	5.80578	5.81384	5.78011	5.79495	5.78001	5.81148	5.78278	5.79943	5.78312	5.81277	5.84902	5.80672
miR-553	5.80844	5.90563	5.79339	5.94184	5.76671	5.78644	5.85621	5.83387	5.83138	5.81877	5.95342	5.81548	5.79046	6.00637	5.90939	5.88824	5.92344	5.82859
miR-554	5.77874	5.79937	5.76672	5.77303	5.81321	5.76935	5.76606	5.80475	5.77722	5.78134	6.19453	5.87719	5.79748	5.76758	5.7663	5.75515	5.76549	5.75851
miR-555	5.76944	5.80011	5.81689	5.76411	5.75797	5.80191	5.79664	5.83272	5.76845	5.77211	5.84062	5.79033	5.82195	5.9411	5.77186	5.78977	5.79325	5.77517
miR-556-5p	5.75868	5.80973	5.78947	5.79941	5.77459	5.80227	5.79512	5.78477	5.76215	5.76605	5.80136	5.85539	5.76013	5.92552	5.78346	5.82185	5.8004	5.79448
miR-557	5.7474	6.27313	5.76821	5.78736	6.28608	5.76885	5.93354	6.91204	5.90598	6.11199	7.44779	5.87812	5.76481	5.70949	5.95067	6.14603	6.05356	6.12138
miR-558	5.77453	5.83668	5.8278	5.77881	5.78351	5.78046	5.77837	5.78732	5.79142	5.78931	5.79373	5.84422	5.80632	5.93261	5.79035	5.77689	5.79878	5.78592
miR-559	5.78106	5.78042	5.91662	5.75621	5.78406	5.78396	5.78237	5.78996	5.77261	5.78252	6.02426	5.90572	5.78444	6.26029	5.82326	5.79625	5.84309	5.8504
miR-561-3p	5.77671	5.87399	5.75679	5.84713	5.76938	5.77983	5.84355	5.8913	5.79279	5.79309	5.85796	5.76499	5.77147	6.06933	5.86464	5.85507	5.86874	5.81785
miR-562	5.78188	5.82785	5.80495	5.8297	5.77876	5.80657	5.82476	5.93114	5.7874	5.80591	5.81625	5.85986	5.83214	5.89874	5.83173	5.76411	5.8193	5.79319
miR-563	5.84566	6.0938	6.70479	5.74905	5.96098	5.97261	5.814	6.04229	5.90236	5.96692	5.53009	6.20307	6.04422	5.64952	5.91983	5.91596	5.94806	5.88574
miR-564	6.19831	6.25278	5.77923	5.96152	6.10697	5.87312	6.0664	6.35221	6.23601	6.89798	6.6723	6.64026	6.05401	6.00561	6.35117	6.51871	6.92016	7.05038
miR-566	5.7971	5.81117	6.01751	5.83609	5.91748	5.84056	5.76074	5.7847	5.85993	5.85662	5.83093	5.77217	5.86217	5.7992	5.80096	5.80701	5.76891	5.86525
miR-567	5.75417	5.79656	5.87943	5.7724	5.84344	5.77841	5.76084	5.77201	5.75922	5.77805	5.81467	5.7616	5.78186	5.80351	5.77466	5.77911	5.77296	5.80321
miR-568	5.78855	5.89811	5.79774	5.80003	5.89768	5.78377	5.86476	5.79738	5.82218	5.80899	5.9261	5.77301	5.82233	6.42358	5.83338	5.83402	5.86693	5.86283
miR-569	5.79798	5.903	5.7862	5.76664	5.79092	5.77586	5.83629	5.85195	5.774	5.76785	5.9463	5.77863	5.76198	6.10063	5.87126	5.82297	5.78748	5.76914
miR-570-3p	5.80212	5.79764	5.87024	5.73126	5.77987	5.90249	5.79099	5.81779	5.80714	5.81703	5.74846	5.82219	5.82493	5.85916	5.8017	5.79389	5.79008	5.81145
miR-571	5.92728	5.81635	5.79232	5.71876	6.3428	5.81975	5.87329	5.88326	5.80194	5.81312	6.08122	5.80467	5.81772	6.07131	5.8489	6.1376	5.90803	5.90796
miR-572	6.3149	7.89421	5.8873	5.82965	6.33976	5.90897	6.326	6.77365	6.67423	6.72716	5.6146	6.27505	5.86261	5.69107	6.6011	6.64315	6.52415	6.72719
miR-573	5.78393	5.88342	5.773	5.73589	5.76593	5.77648	5.84704	6.1175	5.78634	5.77764	5.76263	5.77864	5.77079	5.96631	5.82623	5.83108	5.79749	5.82831
miR-574-3p	6.26407	7.12064	6.32973	6.26026	9.16384	6.25319	6.58876	6.94434	6.72352	6.90298	10.4197	6.23847	6.91256	5.64201	6.58573	6.06999	6.77631	7.13569
miR-575	7.07298	8.56252	6.15882	6.74313	7.32321	6.19018	6.80846	7.76605	6.36641	6.52138	6.82237	7.90482	6.01853	9.02872	7.80004	8.4396	7.45682	8.26187
miR-576-5p	5.82191	5.87821	6.12968	6.01239	5.81446	5.91982	5.78724	5.79054	5.8819	5.93498	6.32907	5.92104	5.91767	5.89018	5.84926	5.77964	5.92489	5.85879
miR-577	5.8771	5.85329	5.78534	5.80206	5.79287	5.75912	5.86058	5.80085	5.83234	5.81065	5.87169	5.93622	5.77327	6.5089	5.98849	5.90497	6.04816	5.95858
miR-578	5.76578	5.86764	5.81461	5.8128	5.77774	5.81283	5.82166	5.768	5.79585	5.79051	5.81506	5.80366	5.79763	5.94539	5.83845	5.76538	5.81366	5.80012
miR-579	5.78844	5.79792	5.79567	5.83729	5.75653	5.8232	5.85894	5.81573	5.7809	5.7944	5.80827	5.81232	5.79723	5.91006	5.84074	5.90204	5.79593	5.83574
miR-580	5.79459	5.8338	5.76616	5.77807	5.78047	5.75798	5.83063	5.82306	5.78618	5.78259	5.84033	5.89474	5.76362	6.31698	5.87265	5.81251	5.83291	5.81297
miR-581	5.75851	5.81886	5.81304	5.79774	5.80624	5.79657	5.80212	5.79246	5.79662	5.79983	5.80549	5.76889	5.81189	6.07041	5.84572	5.81218	5.81395	5.81241
miR-582-5p	5.8345	6.33165	5.88155	6.61403	6.04178	5.84524	6.31541	5.99739	5.95343	6.00134	6.77099	5.97663	6.25959	5.82146	6.22549	6.22971	6.39363	6.62601
miR-583	6.12537	6.00632	5.79067	5.78996	5.82386	5.77531	5.76815	5.79981	5.75911	5.75447	5.80131	5.83554	5.77989	5.96729	5.97204	5.94691	5.8901	6.00596
miR-584-5p	6.12641	7.07843	5.96598	5.85182	6.19438	5.97187	6.07154	6.04209	5.91174	5.82119	6.18365	6.76855	6.70018	5.65261	6.03444	6.07904	6.09085	6.19816
miR-585	5.82769	5.83933	5.91019	5.81404	5.81565	6.12312	5.89718	5.8392	5.88041	5.84366	5.9282	5.81564	5.81525	5.91244	5.81001	6.00381	5.82541	5.92145
miR-586	5.81666	5.80508	5.93036	5.83367	5.78591	5.83584	5.89357	5.90707	5.81308	5.84353	5.83197	5.83993	5.80248	6.19496	5.85465	5.88411	5.82485	5.80717
miR-587	5.76583	5.76534	5.77392	5.75889	5.75434	5.76799	5.75635	5.75809	5.76777	5.76954	6.10806	5.78885	5.76507	6.21779	5.76615	5.78742	5.77803	5.80015
miR-588	5.78817	5.87815	5.8155	5.72477	5.86198	5.78288	5.77844	5.79058	5.75267	5.76656	5.93701	5.80588	5.76994	5.78896	5.99003	5.79406	6.09309	6.07836
miR-589-3p	5.76663	5.78298	5.77332	5.81602	5.77434	5.7866	5.7727	5.77209	5.76383	5.76179	5.85962	5.80656	5.81222	5.86365	5.7562	5.78728	5.76435	5.76476
miR-590-5p	6.21859	6.36062	6.09132	6.60888	6.53764	6.83339	6.79148	6.64867	6.20709	6.48534	6.28603	7.66904	7.10265	6.39294	7.1961	6.59712	7.18381	6.61318
miR-591	5.80586	5.88621	5.81144	5.74484	5.79288	5.80365	5.84215	5.79569	5.8229	5.82581	5.80087	5.8479	5.77938	6.13273	5.8384	5.77176	5.79992	5.81395
miR-592	5.79519	5.84746	5.80274	5.76908	5.78937	5.79552	5.85388	5.84534	5.94063	5.90738	6.22708	5.85321	5.8067	6.13425	5.83954	5.83359	5.88638	5.82396
miR-593-5p	5.75844	5.80223	5.77667	5.76619	5.76417	5.76769	5.77382	5.81944	5.7584	5.7602	5.77113	5.78245	5.77141	5.90347	5.76247	5.7584	5.7589	5.76025
miR-595	5.74345	5.89331	5.70857	5.74241	6.23373	5.72499	5.8783	5.73886	5.90735	5.92964	9.71704	6.00967	5.88351	5.68217	6.06707	5.8795	6.21107	6.46795
miR-596	5.82016	5.80021	5.77223	5.72757	5.79675	5.76558	5.76168	5.84547	5.75321	5.75321	5.70492	5.82973	5.76285	5.72339	5.75321	5.76805	5.75539	5.75521
miR-597	5.75396	5.81361	5.83313	5.79001	5.80173	5.80699	5.76413	5.80371	5.75587	5.76867	5.80861	5.80844	5.79893	5.76849	5.76476	5.76095	5.79678	5.75299
miR-598	5.9529	5.80505	5.90698	5.96173	5.92062	5.8171	6.20951	5.95034	5.91006	5.96756	5.92225	6.16522	6.09951	5.91779	6.23793	6.05566	6.28892	6.05543
miR-599	5.75602	5.84068	5.93422	5.80281	5.77236	5.7933	5.80405	5.78523	5.7721	5.79756	5.97741	5.76278	5.79033	5.95067	5.76084	5.86348	5.81005	5.82087
miR-600	5.78603	5.88579	5.75977	5.7471	5.80262	5.78089	5.76296	5.82503	5.76877	5.77091	5.7544	5.83004	5.76829	5.76108	5.78162	5.76372	5.79784	5.78868
miR-601	5.79562	6.90858	5.57644	5.81756	6.93227	5.68021	5.94017	6.0535	5.71154	5.67713	7.01638	6.19011	5.64711	7.20606	6.01127	6.51472	5.99135	6.16644
miR-602	6.15143	6.1128	6.7997	5.77603	6.11724	6.04831	6.10593	6.23482	5.926	6.01935	5.48798	6.57048	6.05443	5.70244	5.92765	6.32661	6.15727	6.18146
miR-603	5.7796	5.79002	5.77436	5.80194	5.80516	5.80711	5.75649	5.74904	5.80524	5.79772	5.90535	5.98846	5.79697	5.95352	5.82641	5.76598	5.76691	5.77992
miR-604	5.86805	5.80769	5.82538	5.79446	5.81507	5.75491	5.76855	5.77248	5.77031	5.80383	5.81751	5.75101	5.77857	5.8161	5.78402	5.78264	5.78492	5.83697
miR-605	5.95383	5.97164	5.96675	5.80936	6.12221	5.77413	5.6923	5.69314	5.83359	5.84329	7.49822	5.94083	5.84206	5.7771	5.68605	5.7332	5.70768	5.72622
miR-606	5.76144	5.81828	5.77907	5.75982	5.80228	5.78282	5.78387	5.77879	5.76962	5.78191	5.8021	5.7909	5.77216	5.85005	5.81401	5.78808	5.79766	5.79578
miR-607	5.75834	5.77913	5.90883	5.8095	5.83631	5.78877	5.7861	5.7956	5.79474	5.81513	5.82837	5.8462	5.81356	6.0478	5.7737	5.7509	5.79446	5.79351
miR-608	5.87254	5.81658	5.79896	5.76133	5.78395	5.76161	5.78643	5.79667	5.78721	5.77417	5.78121	5.97087	5.77925	5.75351	5.80949	5.80663	5.79671	5.78748
miR-609	5.76445	5.70625	5.85281	5.82609	5.90544	5.82635	5.83468	5.84359	5.88972	5.83422	7.68569	5.83951	5.86869	5.9616	5.80641	5.79648	5.79273	5.82225
miR-610	5.79891	6.16707	5.63482	5.77415	6.19983	5.62681	5.8151	5.84972	5.7185	5.64634	8.47368	5.97538	5.65141	5.92878	6.00223	5.91533	5.93319	6.03324
miR-611	5.82769	5.79641	5.81397	5.77863	5.86186	5.79784	5.78872	5.81283	5.77885	5.7712	5.73425	5.90191	5.77626	5.78305	5.76715	5.77993	5.76051	5.76478
miR-612	5.78698	5.76419	5.80966	5.80546	5.78283	5.78978	5.79315	5.84877	5.79622	5.78916	5.92614	5.85337	5.82756	5.78498	5.80363	5.79129	5.76621	5.79604
miR-613	5.7858	5.92574	6.03224	5.87623	5.7879	5.91136	5.78334	5.87047	5.82153	5.81896	6.05622	5.8411	5.90557	5.80917	5.79772	5.77889	5.79229	5.81136
miR-614	5.9006	5.82447	5.77297	5.79046	5.78833	5.7987	5.89384	5.82865	5.79459	5.79426	5.92746	5.85924	5.77623	5.82387	5.93731	5.98669	5.82828	5.87764
miR-615-3p	5.8833	5.73822	5.92718	5.84664	5.98212	5.92381	5.76177	5.77534	5.88947	5.88937	8.27622	5.97605	5.83515	5.69855	5.7704	5.76285	5.76363	5.78188
miR-616-5p	5.78021	5.84793	5.81178	5.81265	5.7856	5.78578	5.79023	5.87403	5.78611	5.80175	5.82609	5.77111	5.80816	5.83389	5.77902	5.8108	5.82181	5.79068
miR-617	5.97393	5.8999	5.87794	5.90019	5.89773	5.83033	5.92524	5.76071	5.793	5.80101	5.9081	5.86676	5.80847	5.83292	5.96453	6.13065	5.87863	5.98151
miR-618	5.78532	5.86998	5.80761	5.80087	5.86141	5.80226	5.81329	5.82198	5.78771	5.79456	5.86862	5.85929	5.82364	5.85604	5.80534	5.78845	5.79932	5.81934
miR-619	5.76008	5.78629	5.81492	5.81105	5.81226	5.78585	5.78053	5.82636	5.75963	5.7767	6.42536	5.76008	5.79628	6.13017	5.80033	5.78935	5.79449	5.81357
miR-620	5.76942	5.81631	5.76952	5.74921	5.76213	5.76274	5.81374	5.79259	5.76274	5.76267	5.83253	5.78516	5.76239	6.4744	5.88288	5.7938	5.84798	5.83421
miR-621	5.78432	5.76035	5.79235	5.75562	5.76697	5.78249	5.75989	5.77456	5.76932	5.7662	5.76988	5.79459	5.79092	5.76892	5.75757	5.75826	5.77632	5.76032
miR-622	6.06483	6.42684	5.69917	5.76634	6.28254	5.72643	5.86636	6.16434	5.84698	5.79751	6.97592	6.22875	5.69715	5.71276	6.28822	6.11044	6.13489	6.37869
miR-623	5.74129	6.25115	5.58486	5.80368	6.21655	5.61401	5.7864	5.6412	5.78866	5.74683	9.05235	6.12963	5.79484	6.08097	6.3886	5.9626	6.63857	6.74571
miR-624-5p	5.87207	5.76449	5.91362	5.97077	5.85181	5.94787	5.9382	6.03445	5.88302	5.88567	6.01479	6.64844	5.95691	5.88726	5.95807	5.86966	5.89321	5.8718
miR-625-5p	5.97206	5.79059	7.00188	6.39118	5.94314	6.23103	6.26038	6.17895	6.21082	6.3283	6.0428	7.06015	7.05369	8.16962	6.581	7.69493	7.13981	7.55836
miR-626	5.7819	5.81736	5.78298	5.79839	5.77769	5.79484	5.83913	5.81637	5.79577	5.784	5.81586	5.78778	5.79384	6.29543	5.81542	5.79845	5.84677	5.85988
miR-627	5.78711	5.81592	5.73115	5.96416	5.88544	5.89869	5.97773	5.7685	5.77122	5.76751	5.94719	6.21633	5.98114	6.01418	6.13523	6.11154	6.21293	6.03032
miR-628-3p	6.11268	5.7859	5.7833	5.92609	5.8149	5.80241	5.90371	5.92317	5.84188	5.86222	5.8903	5.83067	5.95623	6.03403	5.96596	5.99464	6.13078	6.2167
miR-629-3p	6.62738	6.19293	6.21763	6.03285	6.04692	6.14604	6.23419	6.08239	5.89301	5.8952	7.57236	6.08681	5.95035	6.17773	6.14363	6.25724	6.14937	6.32703
miR-630	9.19655	8.35233	5.61372	5.82018	6.83191	6.24836	6.33332	7.2421	6.35322	6.27049	5.88309	5.58519	5.58813	11.2178	7.6681	7.489	6.73476	7.38128
miR-631	5.85479	5.82504	5.93036	5.71835	6.17875	5.8797	5.79191	5.96124	5.92352	5.92428	8.81938	5.99643	5.91279	5.69966	5.8457	5.91707	5.8469	5.92603
miR-632	5.80553	5.84841	5.75965	5.81585	5.88918	5.77747	5.77176	5.7779	5.80572	5.78226	5.89065	6.0987	5.77549	5.77836	5.84598	5.79252	5.8055	5.88753
miR-633	5.76901	5.82468	5.94148	5.75837	5.80473	5.85933	5.7853	5.78787	5.77935	5.80674	5.8393	5.78498	5.84154	5.81735	5.84826	5.80588	5.81047	5.82405
miR-634	5.91606	6.35829	6.78691	5.945	6.12045	6.03258	5.93845	6.1183	5.96941	6.04268	6.03172	6.55811	6.06059	5.59	6.07373	6.18403	6.13039	6.22595
miR-635	5.78644	5.8255	5.86749	5.73509	5.79451	5.79182	5.79318	5.80509	5.7987	5.80518	5.7261	5.8598	5.81678	5.79357	5.79555	5.79495	5.81588	5.83901
miR-636	5.92806	6.26679	6.35382	5.96799	5.99589	5.9541	6.03153	6.22357	5.89946	5.91908	6.97757	6.23967	5.97568	5.68859	6.00666	6.64738	6.13034	6.18518
miR-637	5.82577	5.80092	5.8206	5.708	5.8	5.83934	5.80613	5.92183	5.83461	5.81477	6.08712	5.95555	5.82831	5.73711	5.83258	5.92824	5.83327	5.81749
miR-638	7.31981	9.66406	8.18777	6.50063	8.48173	6.63884	7.58657	8.5974	8.16726	8.3095	8.25562	7.09204	6.45458	7.6879	8.55597	8.99595	8.21526	8.78331
miR-639	5.7966	5.79361	5.76385	5.77155	5.76891	5.76411	5.77695	5.7792	5.76414	5.76413	5.75578	5.76414	5.77004	5.80584	5.76905	5.76276	5.76534	5.7868
miR-640	5.78785	5.81084	5.96906	5.82987	6.031	5.82909	5.75846	5.77102	5.84651	5.86067	7.49281	5.95562	5.89704	5.79147	5.80516	5.74689	5.87026	5.82882
miR-641	5.78126	5.79767	5.87455	5.80457	5.75117	5.80845	5.8272	5.78285	5.79728	5.79796	5.94572	5.77156	5.84556	5.89605	5.81111	5.80439	5.80527	5.81044
miR-642a-5p	5.7597	5.8299	5.88284	5.81838	5.76967	5.82333	5.8104	5.81315	5.79445	5.80513	5.83364	5.81399	5.8296	5.85225	5.79433	5.75977	5.79595	5.79086
miR-643	5.77163	5.87565	5.78922	5.80762	5.76944	5.79279	5.78855	5.76652	5.76157	5.76121	5.79002	5.81189	5.77743	5.96611	5.76855	5.79189	5.7767	5.78907
miR-644a	5.76894	5.83344	5.8202	5.79604	5.78556	5.78034	5.80344	5.8137	5.78637	5.76894	5.77591	5.76894	5.78761	5.89489	5.78027	5.84205	5.78589	5.79253
miR-645	5.82703	5.77489	5.74377	5.77778	5.85632	5.75395	5.79403	5.80811	5.80327	5.77645	6.53088	5.84687	5.77872	5.75453	5.79697	5.81405	5.782	5.78624
miR-646	5.80473	5.8139	5.8049	5.79448	5.77868	5.79277	5.76754	5.77053	5.76949	5.77057	5.7791	5.77008	5.7612	5.85853	5.7726	5.7632	5.75892	5.7906
miR-647	5.82718	5.77728	5.87622	5.73023	5.9448	5.82544	5.77933	5.84706	5.94018	5.93993	8.21101	5.97575	5.94237	5.70312	5.77425	5.79066	5.78194	5.76554
miR-648	5.81165	5.82373	5.75325	5.75555	5.8604	5.75328	5.77858	5.78682	5.80131	5.76576	6.03659	5.75325	5.75402	5.84117	5.86178	5.96058	5.86178	5.95779
miR-649	5.72022	5.82143	5.77752	5.83181	5.79526	5.78007	5.80642	5.81576	5.76243	5.78601	5.8567	5.78996	5.78376	6.54546	5.85704	5.80777	5.88298	5.76247
miR-650	5.97456	5.84844	5.86969	5.77042	6.37858	5.82077	6.21863	5.87634	5.7664	5.77362	5.70672	6.13941	5.86464	5.74882	6.04948	6.64219	6.19119	6.26852
miR-651	5.82919	5.82531	5.83009	5.80761	5.77079	5.77802	5.84019	5.89951	5.81054	5.81507	5.76638	5.86247	5.80311	5.876	5.91633	5.81289	5.83713	5.79836
miR-652-3p	6.25186	5.79901	6.14823	6.52047	5.88288	6.21892	6.50171	6.21482	6.37366	6.3585	6.82322	7.45745	7.3055	6.87065	6.56871	6.52223	7.14727	6.88749
miR-653	5.78733	5.79082	5.81212	5.794	5.79753	5.78973	5.81857	5.77256	5.79469	5.80556	5.83342	5.83904	5.8281	6.2055	5.7853	5.8053	5.79832	5.80574
miR-654-5p	6.12472	5.74245	6.05306	5.97342	5.9968	6.04078	5.87909	5.99809	5.9957	6.01387	5.82539	6.03657	5.98116	6.26174	5.92403	6.20926	6.00194	6.10156
miR-655	6.08915	5.77616	5.85282	5.88226	5.77283	5.88381	5.81713	5.98682	5.81013	5.82962	5.8127	5.82153	5.81654	6.03395	5.8539	5.83719	5.88492	5.80903
miR-656	6.08905	5.84223	6.03413	5.87773	5.91215	5.9926	5.83985	5.93646	5.85405	5.91718	5.87699	5.81753	5.93116	6.01457	5.83489	5.91258	5.93745	5.88661
miR-657	5.79697	5.77405	6.02073	5.80429	5.86232	5.84513	5.75103	5.76125	5.76978	5.78142	5.90181	5.77988	5.87637	5.77865	5.76901	5.74656	5.76706	5.77894
miR-658	5.84695	5.931	5.82776	5.7988	5.8477	5.76637	5.81203	5.85127	5.80195	5.78283	5.9692	5.84618	5.76659	6.23578	5.85836	5.89936	5.8199	5.80471
miR-659-3p	5.79812	5.9825	5.70061	5.70572	6.14538	5.68676	5.75731	6.11015	5.67888	5.66832	5.72172	5.9153	5.70362	5.69432	5.7806	5.99537	5.77546	5.7792
miR-660-5p	8.17164	6.26431	6.21165	6.84432	5.98373	6.48474	6.69955	6.45207	6.48095	6.37007	6.43935	7.37288	6.5869	6.09654	6.33984	6.51585	7.02404	6.42038
miR-661	5.7957	5.83729	5.8188	5.75551	5.82067	5.80572	5.76492	5.77651	5.78821	5.80277	5.78962	5.83852	5.80324	5.77818	5.76781	5.77156	5.77546	5.76049
miR-662	5.96728	6.27244	5.89297	5.80691	5.86778	5.83097	5.89738	6.04562	5.84147	5.83864	6.73163	5.82834	5.82241	5.79392	6.00141	6.29213	5.96326	6.10063
miR-663a	6.38806	7.56602	5.96799	6.06853	6.2948	5.99487	6.13884	6.42925	6.16099	6.04636	5.72249	6.09854	5.8089	6.11926	8.25961	7.19743	7.8818	8.55464
miR-668	5.80649	5.79864	5.91554	5.83377	5.88803	5.82709	5.75799	5.80891	5.78444	5.8593	5.91652	5.80458	5.87449	5.75803	5.7825	5.77527	5.7542	5.7866
miR-671-5p	6.07649	7.44162	5.66249	5.11409	6.8022	5.99015	5.97585	6.58651	5.99743	5.84114	6.15763	6.77156	5.71678	5.11227	6.22923	6.95222	6.20947	6.40599
miR-675-5p	5.90797	5.8496	5.7621	5.75425	5.76188	5.76375	5.75986	5.7577	5.76215	5.76215	5.75741	5.7725	5.7615	5.76228	5.76138	5.7633	5.76132	5.77272
miR-758	5.94981	5.80075	6.83049	6.43458	6.96817	6.33983	5.74806	5.75791	5.94539	5.95543	5.94787	5.90692	6.14448	5.83716	5.72935	5.74507	5.74747	5.74617
miR-7-5p	6.02868	6.33185	6.25191	6.28975	6.98861	6.29982	6.36991	7.03195	6.86304	7.60215	5.80056	7.412	6.30233	5.69984	7.2777	6.90531	6.87151	6.68066
miR-765	5.92871	6.86566	5.67132	5.80077	6.31202	5.68548	5.94095	6.24193	5.8965	5.75005	8.35829	5.76779	5.70249	6.63979	6.50074	6.42796	6.36392	6.64686
miR-766-3p	5.86799	6.65143	7.1177	6.06547	7.4049	6.0178	6.06996	6.58455	6.08623	6.17171	9.61868	6.74095	6.82933	6.98985	6.99601	7.1049	7.27105	7.55847
miR-767-3p	5.83766	5.88554	6.41909	5.76037	5.91218	6.00387	5.8165	5.91723	5.87953	5.95937	5.52529	6.17364	5.96621	5.92181	5.851	5.90137	5.93977	5.86301
miR-767-5p	5.81413	5.84313	5.81892	5.77195	5.96057	5.76942	5.85379	5.82236	5.78115	5.78847	5.83506	5.82411	5.78116	5.768	5.83391	5.82473	5.88423	5.82439
miR-769-3p	5.89047	5.97575	5.73834	5.83402	5.99913	5.81058	5.93813	5.77429	5.83772	5.77722	6.08994	6.26207	5.79653	5.7427	6.01057	5.92625	6.07957	6.09479
miR-769-5p	5.85054	5.98958	6.21223	6.12432	6.10912	5.9939	6.26002	5.97169	5.96446	5.90432	6.04838	6.09913	6.17863	5.89836	6.28734	6.35368	6.36416	6.24411
miR-770-5p	6.14378	5.95019	5.84601	5.78543	7.35926	5.89997	6.41237	6.03471	5.87248	5.91702	6.03219	6.20482	5.88479	5.7955	6.47585	6.52866	6.43548	6.61751
miR-802	5.77221	5.82318	5.86231	5.78301	5.78921	5.81725	5.80242	5.82825	5.7828	5.7837	5.84951	5.77612	5.77842	5.84991	5.88061	5.77444	5.81838	5.82103
miR-92a-3p	6.52439	9.6466	8.69269	9.83374	7.84782	7.33137	8.34283	9.19073	8.54812	8.19106	7.12602	9.75623	9.11786	10.7366	10.2709	10.5348	9.50156	9.77015
miR-92b-3p	5.9005	5.84504	6.6423	5.80111	6.02904	5.99136	5.98755	5.82098	5.89967	5.9212	5.79068	6.40866	6.06729	5.60826	5.90054	5.98712	5.83638	5.96243
miR-93-5p	7.00063	8.48982	7.21811	8.67497	7.48941	6.9815	7.81762	7.53424	6.96535	6.79812	7.57796	9.39493	8.33162	8.86574	9.37758	8.49845	8.55415	8.45867
miR-9-3p	5.7611	5.78171	5.76378	5.77257	5.79212	5.78031	6.57718	5.78374	5.84683	5.83365	5.79525	5.79379	5.85697	6.10226	6.2932	6.18105	5.96007	5.87912
miR-95	5.91589	5.94799	5.79792	5.77476	5.88235	5.89678	6.10531	6.38486	6.28892	6.5944	5.7608	5.84486	6.03506	5.98313	5.93628	6.06366	6.37054	6.0508
miR-9-5p	5.78973	5.79801	5.84486	6.19331	5.69816	5.79265	7.05499	5.86839	5.86782	5.81764	6.21532	5.76878	5.90245	6.67642	6.28414	5.96994	5.93732	5.93991
miR-96-5p	5.63586	5.99961	5.75677	5.76917	6.1591	5.72872	8.50764	6.24261	6.28844	7.50886	5.79273	8.26105	5.74377	6.17675	6.13041	5.97717	5.70742	5.73452
miR-98	9.38798	6.8953	6.97736	7.08252	6.72607	7.37276	7.19563	7.37446	6.94903	7.03901	6.0001	7.24232	7.23849	6.52097	7.18349	6.80682	7.21574	6.98327
miR-99a-5p	7.96289	8.98196	7.29237	8.80608	6.13766	7.69693	7.38953	9.01273	8.34154	7.51403	5.72134	5.90404	6.11818	5.84739	5.7449	5.95984	5.701	5.69061
miR-99b-5p	6.23462	8.35948	6.77347	8.40858	7.52076	6.68435	7.10652	5.68116	6.64363	6.45765	5.82191	5.6254	6.22677	5.85495	6.04046	5.8098	5.61963	5.6668
